# Supplementary material for: Greenhouse gas emissions from riparian zone cropland in a tributary bay of the Three Gorges Reservoir, China
Source: PeerJ. 2020 Feb 18;8:e8503. doi: 10.7717/peerj.8503 (PMC7034375; doi:10.7717/peerj.8503)
Supplement: Data S1 — Sampling time was selected from 9 a.m. to 11 a.m., when transient emissions represented the mean emission of the day. Gas samples were collected from each chamber every 10 mins over a half-hour period using a polypropylene medical syringe through triple valve. [file peerj-08-8503-s003.xlsx]

## Sheet: GHGs in different land uses
Year	land uses	Date	site number	testing data	①0min	②10min	③20min	④30min
2016	dry lands	2016-04-13	1	CH4 (ppm)	2.70276	2.47132	3.27383	2.44005	GHGs flux=ρ*V/A*P/P0*273/(273+T)*dc/dt
				CO2 (ppm)	481.417	635.915	817.6	993.165	ρ is the concentration of GHG in standard atmospheric condition.ρCO2 (kg•m-3) and N2O (mg•m-3) are 1.96 ppm and ρCH4 (kg•m-3):0.717 ppm.
				N2O (ppb)	345.299	356.13	379.26	409.443	V(m3)is the air volume in the chamber;
				Temperature	30	33	33.5	34	A(m2)is the soil surface area in the chamber;
			2	CH4 (ppm)	2.52133	2.64609	2.518	2.68994	P(Pa)is atmospheric pressure
				CO2 (ppm)	527.215	640.332	1035.85	790.148	T(OC) is the air temperature in the chamber;
				N2O (ppb)	350.386	352.704	359.067	378.503	dc/dt is concentration changes in chamber per unit time
				Temperature	34	38	39	40
			3	CH4 (ppm)	2.60178	2.78111	2.82813	2.55649
				CO2 (ppm)	532.77	695.158	796.778	1070.05
				N2O (ppb)	360.017	357.772	361.32	386.129
				Temperature	30	38.6	40	41.3
		2016-05-12	1	CH4 (ppm)	2.24753	2.18436	2.2618	2.41403
				CO2 (ppm)	654.115	647.188	1195.55	1543.76
				N2O (ppb)	357.53	373.777	423.377	448.324
				Temperature	32.5	31	34	38.5
			2	CH4 (ppm)	2.85882	3.03828	2.41068	2.80072
				CO2 (ppm)	359.628	596.784	821.295	1313.09
				N2O (ppb)	589.417	616.001	633.169	691.704
				Temperature	32	34	35	36
			3	CH4 (ppm)	2.50084	2.41697	2.38271	2.32894
				CO2 (ppm)	293.205	867.376	471.099	392.633
				N2O (ppb)	548.267	618.449	654.461	677.453
				Temperature	36	40	41	42
		2016-05-31	1	CH4 (ppm)	3.04151	2.8294	3.35684	2.84582
				CO2 (ppm)	444.527	636.166	326.954	586.772
				N2O (ppb)	594.768	577.145	562.72	604.684
				Temperature	26	26	26	26
			2	CH4 (ppm)	2.77735	3.43534	2.58483	2.56663
				CO2 (ppm)	372.48	447.761	704.929	769.936
				N2O (ppb)	577.018	643.778	723.073	616.553
				Temperature	27.5	29	29	29
			3	CH4 (ppm)	3.1205	2.83004	2.58429	2.87395
				CO2 (ppm)	362.977	499.112	586.315	704.805
				N2O (ppb)	542.593	568.152	583.597	605.901
				Temperature	28	29	29	30
		2016-06-15	1	CH4 (ppm)	2.82144	2.55965	2.72834	2.92697
				CO2 (ppm)	366.018	407.878	496.915	540.766
				N2O (ppb)	562.296	591.546	681.028	715.98
				Temperature	29	29.5	30	30
			2	CH4 (ppm)	2.41849	2.4954	2.8007	3.08754
				CO2 (ppm)	333.881	427.641	526.378	684.117
				N2O (ppb)	571.589	591.415	614.581	657.029
				Temperature	31	33	33	33
			3	CH4 (ppm)	2.72075	3.05312	2.72609	2.75911
				CO2 (ppm)	306.784	419.792	499.144	1137.21
				N2O (ppb)	531.974	544.548	581.319	607.563
				Temperature	30.5	31.5	31.5	32
		2016-07-06	1	CH4 (ppm)	2.68782	3.06164	2.69262	2.96352
				CO2 (ppm)	357.181	451.881	525.688	543.537
				N2O (ppb)	651.425	672.895	688.792	686.868
				Temperature	30	31	32	33
			2	CH4 (ppm)	2.69196	2.52598	2.7264	2.54863
				CO2 (ppm)	348.293	378.777	517.341	622.906
				N2O (ppb)	578.153	564.218	645.357	597.722
				Temperature	29	30	36	36.5
			3	CH4 (ppm)	2.71373	2.56429	2.56911	3.10661
				CO2 (ppm)	359.526	428.806	547.767	651.001
				N2O (ppb)	589.877	588.619	594.227	601.735
				Temperature	30.5	37	37.5	37.5
		2016-07-20	1	CH4 (ppm)	2.29618	2.29912	2.29165	2.40007
				CO2 (ppm)	389.798	562.766	622.491	673.646
				N2O (ppb)	553.247	576.772	586.834	588.884
				Temperature	27	27	27.5	27.8
			2	CH4 (ppm)	2.29218	2.22372	2.42085	2.18199
				CO2 (ppm)	478.655	532.299	507.782	593.528
				N2O (ppb)	564.577	546.454	577.185	557.628
				Temperature	29.5	32.2	34	34.5
			3	CH4 (ppm)	3.10522	2.65684	2.4029	2.35635
				CO2 (ppm)	331.199	636.776	631.377	634.607
				N2O (ppb)	564.761	563.743	625.572	660.529
				Temperature	34.5	37	37.9	39
		2016-08-17	1	CH4 (ppm)	2.50516	2.48542	2.50268	2.5034
				CO2 (ppm)	738.843	869.634	996.501	1074.88
				N2O (ppb)	350.462	375.354	387.802	402.482
				Temperature	26.5	26.5	27	27.5
			2	CH4 (ppm)	2.57424	2.57988	2.59774	2.61604
				CO2 (ppm)	594.754	787.909	831.757	981.228
				N2O (ppb)	342.035	357.745	355.726	365.074
				Temperature	31	34	35	36
			3	CH4 (ppm)	2.46645	2.50101	2.60624	2.55247
				CO2 (ppm)	553.608	709.695	637.6	784.809
				N2O (ppb)	340.355	352.468	351.131	378.83
				Temperature	38	41	42.5	44
		2016-09-01	1	CH4 (ppm)	2.35002	2.36894	2.3794	2.3513
				CO2 (ppm)	602.841	581.316	660.584	741.555
				N2O (ppb)	343.201	361.19	397.972	452.522
				Temperature	25.5	26.5	27.2	28
			2	CH4 (ppm)	2.53318	2.33489	2.36896	2.34819
				CO2 (ppm)	526.915	571.315	605.661	664.25
				N2O (ppb)	341.038	353.801	349.371	382.567
				Temperature	28	29	30	31
			3	CH4 (ppm)	2.36666	2.39846	2.38918	2.52796
				CO2 (ppm)	463.765	729.795	529.128	596.18
				N2O (ppb)	346.829	351.521	348.023	349.584
				Temperature	33	34.2	34.5	34.5
	paddy fields	2016-04-13	1	CH4 (ppm)	2.94494	2.44663	2.38216	2.40139
				CO2 (ppm)	586.579	1296.43	901.978	1059.43
				N2O (ppb)	355.741	349.078	360.022	352.748
				Temperature	27	31	32	34.5
			2	CH4 (ppm)	2.30362	2.35122	2.4276	2.42226
				CO2 (ppm)	564.638	599.004	682.446	848.608
				N2O (ppb)	366.22	368.8	372.377	371.558
				Temperature	32	35.5	36.5	35.5
			3	CH4 (ppm)	2.35529	2.90998	3.01829	2.58012
				CO2 (ppm)	536.14	712.692	783.683	1053.39
				N2O (ppb)	347.595	362.906	374.897	381.051
				Temperature	33.5	35.5	37	37.8
		2016-05-12	1	CH4 (ppm)	2.66177	2.48014	2.98975	2.63458
				CO2 (ppm)	593.974	625.992	570.181	492.324
				N2O (ppb)	363.382	370.861	362.156	388.378
				Temperature	33.5	37.5	39	40
			2	CH4 (ppm)	2.70449	3.03828	2.96437	3.39882
				CO2 (ppm)	369.349	596.784	528.166	368.881
				N2O (ppb)	592.096	616.001	629.713	637.542
				Temperature	30	31.5	30.5	40
			3	CH4 (ppm)	2.14862	2.24518	2.26681	2.31975
				CO2 (ppm)	575.658	450.91	432.838	685.326
				N2O (ppb)	593.626	651.538	702.816	839.979
				Temperature	32	39	41	42
		2016-05-31	1	CH4 (ppm)	2.5476	3.01422	3.3904	3.7079
				CO2 (ppm)	582.134	532.545	419.366	438.504
				N2O (ppb)	540.588	561.768	575.342	569.2
				Temperature	25.5	26.5	27	27.5
			2	CH4 (ppm)	2.54731	3.46766	3.07306	2.65492
				CO2 (ppm)	529.706	361.681	457.911	607.946
				N2O (ppb)	573.17	555.806	580.848	564.057
				Temperature	27.5	28	28	28
			3	CH4 (ppm)	2.77757	2.84514	3.96417	4.15098
				CO2 (ppm)	332.719	365.747	363.378	376.481
				N2O (ppb)	556.649	560.073	565.354	565.725
				Temperature	28	28.5	29	29.5
		2016-06-15	1	CH4 (ppm)	4.34782	3.47223	5.02307	3.07023
				CO2 (ppm)	492.278	467.805	520.359	416.569
				N2O (ppb)	580.045	570.455	572.722	566.674
				Temperature	30	30.5	30.5	30.5
			2	CH4 (ppm)	2.46362	10.53	11.7089	14.2548
				CO2 (ppm)	298.676	345.741	371.516	411.293
				N2O (ppb)	566.869	559.796	562.758	566.274
				Temperature	32.5	33	33	33
			3	CH4 (ppm)	2.60887	6.92702	10.1271	12.943
				CO2 (ppm)	351.294	469.745	440.638	430.683
				N2O (ppb)	555.583	570.149	529.551	560.655
				Temperature	31	32	32	32.5
		2016-07-06	1	CH4 (ppm)	2.52983	2.65187	2.76766	2.99006
				CO2 (ppm)	346.887	370.931	400.525	429.357
				N2O (ppb)	666.008	656.046	668.332	675.158
				Temperature	30	30	31	31
			2	CH4 (ppm)	2.36446	2.74625	3.55517	3.25214
				CO2 (ppm)	327.888	358.149	387.072	406.718
				N2O (ppb)	552.378	572.046	663.744	569.82
				Temperature	31	32	31.5	31.1
			3	CH4 (ppm)	5.37116	6.4721	6.30809	7.4565
				CO2 (ppm)	351.79	390.878	406.954	413.278
				N2O (ppb)	564.472	571.831	662.962	564.045
				Temperature	32.5	33.5	33.5	33.5
		2016-07-20	1	CH4 (ppm)	2.39837	2.35071	3.46436	2.63835
				CO2 (ppm)	381.905	454.477	370.45	412.397
				N2O (ppb)	582.782	565.83	571.253	603.873
				Temperature	27.5	27.5	27.5	27.5
			2	CH4 (ppm)	2.48258	2.33973	2.76815	3.26154
				CO2 (ppm)	408.234	371.182	382.126	379.451
				N2O (ppb)	572.337	564.89	566.266	564.514
				Temperature	28.5	30	30.2	30.2
			3	CH4 (ppm)	4.2348	5.24202	6.0366	6.86169
				CO2 (ppm)	324.728	357.282	392.423	385.381
				N2O (ppb)	564.361	548.563	571.912	566.69
				Temperature	34	34.2	34.2	34.7
		2016-08-17	1	CH4 (ppm)	2.55527	2.72051	2.57027	2.55185
				CO2 (ppm)	715.367	781.107	1075.02	1169.54
				N2O (ppb)	333.22	346.906	356.867	359.558
				Temperature	27	27	27	28
			2	CH4 (ppm)	2.64039	2.57905	2.57554	2.58442
				CO2 (ppm)	569.459	695.18	796.65	900.785
				N2O (ppb)	340.345	341.581	339.718	345.429
				Temperature	29.5	30	31	31
			3	CH4 (ppm)	2.48088	2.45688	2.55889	2.51729
				CO2 (ppm)	550.879	723.649	890.688	1452.11
				N2O (ppb)	336.399	391.074	446.85	508.433
				Temperature	39	41.5	41.5	42.5
		2016-09-01	1	CH4 (ppm)	2.32671	2.3206	2.32918	2.3266
				CO2 (ppm)	495.837	588.455	688.934	743.586
				N2O (ppb)	345.41	343.978	342.835	343.926
				Temperature	26.3	27	27.8	28.5
			2	CH4 (ppm)	2.31934	2.38974	2.67716	2.48004
				CO2 (ppm)	482.748	546.834	537.816	1149.1
				N2O (ppb)	332.772	341.353	332.799	340.515
				Temperature	28	29.5	30	31
			3	CH4 (ppm)	2.40959	2.445	2.45378	2.48088
				CO2 (ppm)	524.88	935.319	1331.56	751.736
				N2O (ppb)	346.762	355.368	367.131	380.958
				Temperature	29.5	32.5	33.8	34
	grass fields	2016-05-12	1	CH4 (ppm)	2.3515	2.79116	3.48234	3.55575
				CO2 (ppm)	526.354	940.761	1283.73	1336.92
				N2O (ppb)	357.374	443.812	543.731	572.765
				Temperature	26	29	31	32.5
			2	CH4 (ppm)	2.91881	3.22309	3.14538	2.83145
				CO2 (ppm)	512.954	817.852	692.204	1219.04
				N2O (ppb)	593.978	616.048	613.351	617.026
				Temperature	34	36	37.6	38
			3	CH4 (ppm)	2.18318	2.25393	2.48378	2.50402
				CO2 (ppm)	511.755	789.544	1191.91	862.94
				N2O (ppb)	604.509	574.534	635.175	666.218
				Temperature	37	41	46	46.5
		2016-05-31	1	CH4 (ppm)	2.88843	2.9238	2.91919	2.81051
				CO2 (ppm)	597.965	486.531	512.789	917.891
				N2O (ppb)	564.025	574.057	585.681	583.597
				Temperature	26	27	28	29.5
			2	CH4 (ppm)	2.55032	3.79778	2.77773	2.63659
				CO2 (ppm)	372.622	631.113	614.809	920.697
				N2O (ppb)	564.784	616.794	591.676	583.775
				Temperature	30	30	30	30
			3	CH4 (ppm)	3.591	4.0611	3.66431	3.83305
				CO2 (ppm)	378.464	671.374	713.048	948.013
				N2O (ppb)	597.978	577.866	577.052	568.34
				Temperature	29.5	31	31.5	32.5
		2016-06-15	1	CH4 (ppm)	2.92571	3.08974	3.49362	3.08745
				CO2 (ppm)	322.305	482.785	689.06	708.802
				N2O (ppb)	563.738	592.368	622.334	652.588
				Temperature	31.5	34	35	35.5
			2	CH4 (ppm)	2.80677	2.82521	2.87311	2.60289
				CO2 (ppm)	307.408	536.139	517.6	918.832
				N2O (ppb)	563.903	642.826	627.288	860.99
				Temperature	35.5	37	37.5	37.5
			3	CH4 (ppm)	2.50359	3.18707	2.45073	2.91364
				CO2 (ppm)	305.398	443.46	663.007	954.784
				N2O (ppb)	536.088	598.199	642.394	696.319
				Temperature	32.5	34.8	36	36.5
		2016-07-06	1	CH4 (ppm)	2.5052	2.84887	2.75074	3.72625
				CO2 (ppm)	368.925	550.196	737.611	412.962
				N2O (ppb)	645.245	673.599	587.247	576.793
				Temperature	29.5	32.5	33.5	34
			2	CH4 (ppm)	2.62378	4.09426	4.9845	6.05644
				CO2 (ppm)	317.668	470.708	683.487	928.589
				N2O (ppb)	549.869	632.274	756.039	958.654
				Temperature	31.2	35	37	37.5
			3	CH4 (ppm)	3.28425	2.98909	2.84315	3.10333
				CO2 (ppm)	326.626	485.561	663.871	731.029
				N2O (ppb)	566.327	587.538	602.206	594.898
				Temperature	35.5	38	38.5	38.5
		2016-07-20	1	CH4 (ppm)	2.86686	2.38817	2.30444	2.34266
				CO2 (ppm)	387.459	519.647	577.564	662.969
				N2O (ppb)	567.775	580.298	591.753	612.712
				Temperature	27.5	28.2	29	30
			2	CH4 (ppm)	2.42078	2.74995	2.64974	2.98562
				CO2 (ppm)	399.757	380.624	422.082	619.703
				N2O (ppb)	566.852	561.71	567.828	559.681
				Temperature	31	36	37.5	39.5
			3	CH4 (ppm)	2.34056	2.35575	2.57278	3.18542
				CO2 (ppm)	333.029	577.14	608.555	819.272
				N2O (ppb)	564.677	570.234	572.856	572.39
				Temperature	37	39	46.5	47.5
		2016-08-17	1	CH4 (ppm)	2.51559	2.55876	2.53305	2.51255
				CO2 (ppm)	701.019	875.245	1143.85	1285.45
				N2O (ppb)	349.04	357.746	373.555	382.693
				Temperature	27	28	28.5	28.5
			2	CH4 (ppm)	2.59525	2.57789	2.60998	2.60147
				CO2 (ppm)	673.792	1162.12	1618.62	1774.6
				N2O (ppb)	344.13	362.402	377.598	393.703
				Temperature	30.5	33	35	37.5
			3	CH4 (ppm)	2.47472	2.61417	2.53432	2.68257
				CO2 (ppm)	638.042	982.953	1246.39	1000.54
				N2O (ppb)	342.271	348.963	357.841	352.099
				Temperature	33.5	35.5	36.5	39
		2016-09-01	1	CH4 (ppm)	2.38902	2.49677	2.39142	2.69887
				CO2 (ppm)	510.774	603.931	775.108	713.482
				N2O (ppb)	340.159	345.961	336.623	348.629
				Temperature	25.5	27	27.2	28
			2	CH4 (ppm)	2.53687	2.38943	2.36999	2.3312
				CO2 (ppm)	463.831	662.269	1055.47	1075.34
				N2O (ppb)	336.228	343.285	346.883	347.499
				Temperature	27	29	29.5	30.5
			3	CH4 (ppm)	2.39318	2.34226	2.44487	2.5237
				CO2 (ppm)	487.018	529.968	585.16	613.033
				N2O (ppb)	339.822	340.675	335.906	339.192
				Temperature	32.2	34	34.8	34

## Sheet: GHGs in different elevations
Different elevations
land uses	Year	Date	Eelevation(m)	testing data	①0min	②10min	③20min	④30min	GHGs flux=ρ*V/A*P/P0*273/(273+T)*dc/dt
dry lands	2015	2015-04-14	180	CH4 (ppm)	0	4.60817	3.99114	82.7005	ρ is the concentration of GHG in standard atmospheric condition.ρCO2 (kg•m-3) and N2O (mg•m-3) are 1.96 ppm and ρCH4 (kg•m-3):0.717 ppm.
				CO2 (ppm)	408.603	546.094	667.254	800.967	V(m3)is the air volume in the chamber;
				N2O (ppb)	322.064	315.496	308.928	295.587	A(m2)is the soil surface area in the chamber;
				Temperature	24.9	28	30	30.2	P(Pa)is atmospheric pressure
			175	CH4 (ppm)	1.48188	1.48	1.43358	12.5416	T(OC) is the air temperature in the chamber;
				CO2 (ppm)	574.53	462.673	438.711	496.93	dc/dt is concentration changes in chamber per unit time
				N2O (ppb)	269.454	261.624	306.035	277.445
				Temperature	31	30	30	31
			170	CH4 (ppm)	3.60942	100.907	81.8531	5.21038
				CO2 (ppm)	423.664	433.324	444.887	472.348
				N2O (ppb)	259.121	260.498	311.983	274.185
				Temperature	33	35	35	35
		2015-05-06	180	CH4 (ppm)	2.65085	3.07361	2.81811	4.03263
				CO2 (ppm)	420.321	474.825	549.607	596.743
				N2O (ppb)	264.31	273.794	294.37	287.113
				Temperature	39	40	42	42
			175	CH4 (ppm)	3.94702	3.92869	3.45851	4.03263
				CO2 (ppm)	395.8	419.144	422.72	455.924
				N2O (ppb)	281.717	262.473	245.2	220.12
				Temperature	37	36	36	37
			170	CH4 (ppm)	3.20521	4.51993	4.08213	4.43004
				CO2 (ppm)	406.73	1449.04	1148.07	1613.13
				N2O (ppb)	302.407	280.063	306.701	368.588
				Temperature	37	37	38	38
			165	CH4 (ppm)	2.96485	5.16944	4.5219	6.68589
				CO2 (ppm)	526.713	576.867	698.368	813.769
				N2O (ppb)	269.959	1059.86	1615.07	2259.93
				Temperature	38	36	36	36
		2015-05-20	180	CH4 (ppm)	3.63017	3.99246	3.77087	3.77954
				CO2 (ppm)	501.342	694.529	826.865	882.592
				N2O (ppb)	254.183	282.865	284.174	277.767
				Temperature	29	29	29	29
			175	CH4 (ppm)	3.11565	3.33921	3.52612	3.66167
				CO2 (ppm)	523.215	549.298	602.533	697.222
				N2O (ppb)	283.439	268.352	276.182	267.273
				Temperature	33	34.5	34.5	34.5
			170	CH4 (ppm)	1.34304	1.25941	1.32032	1.37717
				CO2 (ppm)	446.249	559.298	790.441	979.604
				N2O (ppb)	281.005	263.507	276.251	288.146
				Temperature	36	35	35	35
			165	CH4 (ppm)	3.61261	4.06446	4.21602	4.93786
				CO2 (ppm)	472.364	623.941	769.017	912.731
				N2O (ppb)	272.968	801.267	1513.57	23032.6
				Temperature	39	41	41	41
		2015-06-16	180	CH4 (ppm)	4.24456	4.11683	4.1432	4.21972
				CO2 (ppm)	507.348	651.278	832.686	1157.7
				N2O (ppb)	288.468	340.021	412.71	489.907
				Temperature	25	25	25	25
			175	CH4 (ppm)	3.72953	3.87691	4.08128	4.09552
				CO2 (ppm)	461.652	581.744	832.686	1157.7
				N2O (ppb)	273.477	298.784	329.826	354.482
				Temperature	26	30	31	31
			170	CH4 (ppm)	4.15462	4.27458	3.92647	4.03384
				CO2 (ppm)	641.186	574.917	864.682	760.968
				N2O (ppb)	302.134	289.577	317.607	350.144
				Temperature	29	30	30	30.5
			165	CH4 (ppm)	4.55522	4.48859	3.91765	4.04902
				CO2 (ppm)	450.197	667.269	879.31	1028.35
				N2O (ppb)	318.932	917.705	1711.65	2586.65
				Temperature	33	33	33	33
		2015-07-23	180	CH4 (ppm)	3.81476	3.85066	3.79969	3.81923
				CO2 (ppm)	511.295	791.958	837.856	1085.35
				N2O (ppb)	308.159	334.839	334.309	360.435
				Temperature	26.5	26.5	26.5	26.5
			175	CH4 (ppm)	3.83465	3.86467	3.80122	4.06539
				CO2 (ppm)	532.827	602.595	840.921	1046.91
				N2O (ppb)	327.705	469.252	664.039	923.079
				Temperature	30	30.5	31	30
			170	CH4 (ppm)	4.15403	4.09658	4.13908	3.86067
				CO2 (ppm)	533.571	1030.18	874.388	1064.91
				N2O (ppb)	367.882	321.174	314.377	371.015
				Temperature	28.5	30.5	33.5	33
			165	CH4 (ppm)	3.98322	4.28258	4.39442	4.43291
				CO2 (ppm)	539.654	764.497	1236.68	1138.02
				N2O (ppb)	312.666	419.869	525.095	668.859
				Temperature	30	33	35	35
		2015-08-20	180	CH4 (ppm)	2.56977	3.32212	2.38558	2.58836
				CO2 (ppm)	465.351	672.486	892.871	1251.14
				N2O (ppb)	320.778	300.717	311.772	283.875
				Temperature	26	26	26	26
			175	CH4 (ppm)	2.81724	2.82476	2.44355	2.11743
				CO2 (ppm)	493.447	596.078	912.638	849.326
				N2O (ppb)	332.378	350.98	347.349	392.847
				Temperature	25.5	26	26.5	27
			170	CH4 (ppm)	2.87266	2.59898	2.32828	2.4389
				CO2 (ppm)	644.189	1117.22	1126.85	1275.56
				N2O (ppb)	339.281	350.308	375.365	374.962
				Temperature	27	27.5	27	28
			165	CH4 (ppm)	2.7054	2.75794	3.49823	2.9929
				CO2 (ppm)	418.649	636.526	652.78	769.342
				N2O (ppb)	320.096	327.492	259.761	332.961
				Temperature	29	30	32	32
		2015-09-08	180	CH4 (ppm)	2.78294	2.60517	2.89456	2.53271
				CO2 (ppm)	651.975	652.052	900.704	1061.99
				N2O (ppb)	281.624	374.883	444.298	516.866
				Temperature	26	26	26	26
			175	CH4 (ppm)	2.35549	2.68515	2.69433	2.89644
				CO2 (ppm)	584.963	684.359	918.49	1099.68
				N2O (ppb)	304.319	308.935	298.938	306.233
				Temperature	25.5	26	26.5	27
			170	CH4 (ppm)	2.81463	2.44638	2.55686	2.46502
				CO2 (ppm)	556.016	718.058	964.031	1113.04
				N2O (ppb)	250.71	297.069	285.992	298.938
				Temperature	26.5	26.8	27	27
			165	CH4 (ppm)	2.53493	2.69909	3.01779	2.64699
				CO2 (ppm)	513.555	837.964	888.196	1121.1
				N2O (ppb)	307.246	282.367	335.706	348
				Temperature	29	30	32	33.5
Paddy fields	2015	2015-04-14	175	CH4 (ppm)	3.68669	4.17124	4.27551	4.37319
				CO2 (ppm)	434.361	436.795	438.545	442.828
				N2O (ppb)	256.732	254.895	276.848	281.74
				Temperature	26	28	29	30
			170	CH4 (ppm)
				CO2 (ppm)	408.587	411.931	397.209	404.222
				N2O (ppb)	266.492	274.231	329.986	270.35
				Temperature	30	31.5	32	32
		2015-05-06	175	CH4 (ppm)	3.18841	3.52052	4.61464	3.98554
				CO2 (ppm)	435.522	543.942	531.032	508.37
				N2O (ppb)	267.984	256.618	227.844	210.65
				Temperature	40	41	41	41
			170	CH4 (ppm)	4.06226	3.38092	3.35732	3.88062
				CO2 (ppm)	420.042	483.834	744.157	377.844
				N2O (ppb)	251.841	262.106	247.593	292.624
				Temperature	36	40	40	40
			165	CH4 (ppm)	4.17201	3.61787	4.01221	4.17146
				CO2 (ppm)	592.44	496.558	480.816	512.348
				N2O (ppb)	282.957	259.327	253.977	270.35
				Temperature	35	40	45	45
		2015-05-20	175	CH4 (ppm)	3.59022	6.75514	8.69765	9.03481
				CO2 (ppm)	469.484	624.978	530.382	698.182
				N2O (ppb)	257.329	255.906	259.787	287.664
				Temperature	30	33	33	33
			170	CH4 (ppm)	6.19113	6.11737	6.64243	13.1797
				CO2 (ppm)	468.107	483.881	534.592	469.779
				N2O (ppb)	248.052	251.451	255.171	271.153
				Temperature	34	36	36	36
			165	CH4 (ppm)	3.30695	20.0625	36.4508	42.0574
				CO2 (ppm)	468.865	496.094	545.722	595.876
				N2O (ppb)	286.034	288.514	313.039	267.158
				Temperature	33	35	35	35
		2015-06-16	175	CH4 (ppm)	13.5248	29.2521	33.3398	35.7375
				CO2 (ppm)	645.179	678.012	963.985	976.167
				N2O (ppb)	274.176	293.24	322.692	352.626
				Temperature	28	29	29.5	30
			170	CH4 (ppm)	3.99028	16.5152	4.6361	4.24503
				CO2 (ppm)	555.041	524.546	934.346	946.013
				N2O (ppb)	300.182	286.396	299.868	302.134
				Temperature	26.5	27.5	27.5	27.5
			165	CH4 (ppm)	4.18911	4.42502	6.02933	10.4483
				CO2 (ppm)	483.865	531.032	520.722	593.57
				N2O (ppb)	303.749	310.521	344.841	340.069
				Temperature	29	29	29.5	29.5
		2015-07-23	175	CH4 (ppm)	10.3535	35.243	29.5367	32.6415
				CO2 (ppm)	572.657	631.093	979.712	929.712
				N2O (ppb)	358.627	445.994	568.164	636.78
				Temperature	28	28	28	28
			170	CH4 (ppm)	4.96077	25.1337	30.1774	39.878
				CO2 (ppm)	602.672	491.961	563.43	605.923
				N2O (ppb)	300.543	291.602	284.998	330.477
				Temperature	31	31.5	31.5	32
			165	CH4 (ppm)	3.76251	5.55244	5.62107	5.71395
				CO2 (ppm)	581.527	529.267	666.743	635.597
				N2O (ppb)	178.068	357.904	299.459	330.308
				Temperature	31.5	32.5	33.5	33
		2015-08-20	175	CH4 (ppm)	2.68261	2.68902	2.67553	2.6846
				CO2 (ppm)	540.475	650.768	715.751	1049.13
				N2O (ppb)	278.922	267.327	305.22	339.601
				Temperature	25.5	25	26	26
			170	CH4 (ppm)	2.72022	2.48581	2.69389	2.76812
				CO2 (ppm)	632.099	730.798	782.221	904.806
				N2O (ppb)	310.804	280.701	287.951	292.296
				Temperature	25.5	25.5	25.5	25.5
			165	CH4 (ppm)	3.21371	3.49546	2.89998	3.0751
				CO2 (ppm)	426.652	569.778	543.013	530.707
				N2O (ppb)	316.14	294.368	264.782	321.184
				Temperature	28	28.8	28.8	29
		2015-09-08	175	CH4 (ppm)	2.3139	2.70882	2.65407	2.54886
				CO2 (ppm)	654.761	617.765	644.018	697.16
				N2O (ppb)	260.392	310.038	307.359	294.795
				Temperature	25	25	26	26
			170	CH4 (ppm)	2.65413	2.90669	2.44982	2.44672
				CO2 (ppm)	571.248	623.43	594.112	592.502
				N2O (ppb)	289.144	385.218	526.57	577.455
				Temperature	28	28.5	28.5	28.5
			165	CH4 (ppm)	2.63482	3.25807	3.14778	3.15972
				CO2 (ppm)	799.218	795.441	724.033	877.437
				N2O (ppb)	307.111	300.92	305.963	305.67
				Temperature	28	28.5	28.5	29
	2016	2016-04-12	175-1	CH4 (ppm)	2.05924	3.08576		3.28629
				CO2 (ppm)	471.305	687.965	880.277	1179.58
				N2O (ppb)	320.297	353.853	360.299	385
				Temperature	33	32.5	32.5	33
			175-2	CH4 (ppm)	2.41704	2.89655	3.39767	2.79312
				CO2 (ppm)	467.176	595.673	861.386	815.15
				N2O (ppb)	323.935	337.513	357.557	339.42
				Temperature	31	32	32	32.5
			175-3	CH4 (ppm)	2.58107	2.5339	3.24239	2.85463
				CO2 (ppm)	593.178	550.502	671.28	834.251
				N2O (ppb)	347.291	318.25	345.958	332.609
				Temperature	30	32	32.5	32.5
			170-1	CH4 (ppm)	2.2606	2.36571	2.87431	2.45387
				CO2 (ppm)	464.755	817.656	1417.53	1080.04
				N2O (ppb)	329.157	347.986	354.043	363.731
				Temperature	32	32.5	32.8	34
			170-2	CH4 (ppm)	2.31183	2.34481	2.77264	2.41286
				CO2 (ppm)	585.903	1091.17	1074.31	1416.86
				N2O (ppb)	348.954	337.419	355.987	367.576
				Temperature	31.5	33.5	34	34.2
			170-3	CH4 (ppm)	3.07131	2.31142	2.66206	2.38492
				CO2 (ppm)	538.074	1073.11	900.855	2211.01
				N2O (ppb)	346.798	351.016	357.805	370.096
				Temperature	29	32	34	34.5
			165-1	CH4 (ppm)	2.85668	4.99419	7.51245	10.0484
				CO2 (ppm)	459.278	751.04	626.029	770.784
				N2O (ppb)	334.535	345.485	336.858	354.541
				Temperature	31.5	32.5	32.5	33
			165-2	CH4 (ppm)	2.89225	3.56171	5.6077	6.11338
				CO2 (ppm)	465.744	709.709	1069.08	1444.64
				N2O (ppb)	338.05	342.359	359.862	377.628
				Temperature	30.5	32.5	32.5	33
			165-3	CH4 (ppm)	2.86353	4.85657	4.98442	5.92428
				CO2 (ppm)	675.673	569.978	1201.68	1262.64
				N2O (ppb)	344.294	339.655	345.34	355.48
				Temperature	31.5	32.5	32.8	33
		2016-04-28	175-1	CH4 (ppm)	2.94757	3.98318	3.94121	5.0567
				CO2 (ppm)	510.634	531.751	584.66	634.055
				N2O (ppb)	332.803	342.454	342.204	349.16
				Temperature	28	31	32	32.5
			175-2	CH4 (ppm)	2.99772	2.70293	3.24338	2.98767
				CO2 (ppm)	498.425	529.675	535.634	560.709
				N2O (ppb)	340.542	332.615	340.345	340.152
				Temperature	33	34	34.5	35
			175-3	CH4 (ppm)	2.55969	3.2712	3.22038	3.36785
				CO2 (ppm)	526.561	520.965	535.266	550.339
				N2O (ppb)	341.241	346.707	351.587	362.255
				Temperature	33	33	33	34.5
			170-1	CH4 (ppm)	2.76488	3.0093	3.15005	2.84745
				CO2 (ppm)	605.47	500.061	507.602	541.754
				N2O (ppb)	343.879	339.284	345.285	346.798
				Temperature	34.5	36.5	38	39.5
			170-2	CH4 (ppm)	2.90525	2.94944	2.963	2.98277
				CO2 (ppm)	481.538	511.143	550.044	554.543
				N2O (ppb)	341.947	342.635	349.712	339.433
				Temperature	36	40	41.5	42
			170-3	CH4 (ppm)	3.07572	2.88299	3.35011	2.89476
				CO2 (ppm)	517.99	532.778	538.021	532.714
				N2O (ppb)	335.18	341.768	332.172	334.772
				Temperature	38	38	39	39
			165-1	CH4 (ppm)	3.03161	15.721	22.7793	27.511
				CO2 (ppm)	584.195	594.741	795.033	877.425
				N2O (ppb)	347.552	330.097	346.734	354.272
				Temperature	40	44	44.5	45
			165-2	CH4 (ppm)	3.19285	2.45473	3.2002	2.94544
				CO2 (ppm)	474.126	580.359	759.569	932.496
				N2O (ppb)	340.676	364.41	387.591	393.756
				Temperature	34	40	40.5	40.5
			165-3	CH4 (ppm)	2.83825	3.15569	3.60915	4.51744
				CO2 (ppm)	493.792	545.361	552.984	609.442
				N2O (ppb)	338.386	343.839	346.341	335.951
				Temperature	35	39.5	39.5	39.5
		2016-05-12	175-1	CH4 (ppm)	2.22042	2.31098	2.47649	2.52235
				CO2 (ppm)	431.56	402.914	334.645	342.975
				N2O (ppb)	583.379	579.015	566.945	573.495
				Temperature	35	36.5	34	32.5
			175-2	CH4 (ppm)	2.26181	2.72088	2.87986	3.54102
				CO2 (ppm)	359.444	337.052	433.412	476.99
				N2O (ppb)	573.915	593.082	597.187	607.37
				Temperature	32.5	34	32.5	31.5
			175-3	CH4 (ppm)	8.30303	36.0287	35.1504	39.521
				CO2 (ppm)	313.275	457.934	327.753	502.385
				N2O (ppb)	576.232	608.408	600.499	635.86
				Temperature	36.5	35	32.5	31.5
			170-1	CH4 (ppm)	2.45354	2.61122	2.90689	2.7834
				CO2 (ppm)	371.449	426.044	400.582	439.319
				N2O (ppb)	580.397	600.012	599.249	613.075
				Temperature	22	25	26	26
			170-2	CH4 (ppm)	2.66177	2.48014	2.98975	2.63458
				CO2 (ppm)	593.974	625.992	570.181	492.324
				N2O (ppb)	363.382	370.861	362.156	388.378
				Temperature	33.5	37.5	39	40
			170-3	CH4 (ppm)	2.50591	2.69115	2.95529	3.03387
				CO2 (ppm)	460.165	453.28	428.754	462.703
				N2O (ppb)	586.907	613.012	629.472	650.144
				Temperature	24	25	25.6	26
			165-1	CH4 (ppm)	2.23146	2.27193	2.41839	2.39031
				CO2 (ppm)	344.874	337.224	310.401	1094.16
				N2O (ppb)	548.903	554.811	570.136	583.428
				Temperature	34	35	36	38
			165-2	CH4 (ppm)	2.18724	2.28308	2.81336	2.34474
				CO2 (ppm)	360.704	353.823	373.23	1205.09
				N2O (ppb)	586.933	569.178	567.608	578.142
				Temperature	30.5	36.5	38.5	40.5
			165-3	CH4 (ppm)	2.21376	2.45621	2.53686	2.71268
				CO2 (ppm)	396.692	685.61	302.437	1095.57
				N2O (ppb)	560.389	566.995	571.199	588.958
				Temperature	32	36	37	39
		2016-05-30	175-1	CH4 (ppm)	2.72184	2.62281	2.90636	2.40038
				CO2 (ppm)	335.496	347.147	361.985	416.972
				N2O (ppb)	553.986	570.593	560.116	587.3
				Temperature	24	24	26	26
			175-2	CH4 (ppm)	3.17948	2.53522	2.56617	3.32506
				CO2 (ppm)	916.462	615.61	615.332	623.353
				N2O (ppb)	583.772	575.769	586.037	570.055
				Temperature	23	24	24	25
			175-3	CH4 (ppm)	2.39876	2.81982	3.17738	4.73385
				CO2 (ppm)	717.205	643.238	930.335	830.483
				N2O (ppb)	580.63	570.373	563.183	584.661
				Temperature	23	23.5	26.5	28
			170-1	CH4 (ppm)	2.95763	2.66705	2.53918	2.85955
				CO2 (ppm)	364.902	418.509	339.686	401.037
				N2O (ppb)	566.891	559.636	567.782	565.692
				Temperature	25	28	31.5	33.5
			170-2	CH4 (ppm)	2.29486	2.48665	2.58024	4.53691
				CO2 (ppm)	585.291	618.964	566.115	697.777
				N2O (ppb)	561.186	567.222	549.323	564.656
				Temperature	26	27.5	29	29
			170-3	CH4 (ppm)	2.14699	2.41394	3.18626	3.02793
				CO2 (ppm)	532.85	563.508	567.049	562.892
				N2O (ppb)	573.155	576.65	572.527	549.463
				Temperature	25.5	28.5	30	30.5
			165-1	CH4 (ppm)	2.34497	2.48974	2.45601	2.82052
				CO2 (ppm)	449.554	372.499	437.995	456.546
				N2O (ppb)	565.559	537.154	548.761	573.12
				Temperature	26	28	32.5	33
			165-2	CH4 (ppm)	2.1887	2.38305	2.43062	2.27656
				CO2 (ppm)	889.272	526.204	657.524	1021.52
				N2O (ppb)	568.48	559.067	563.329	547.065
				Temperature	27	36	34	36
			165-3	CH4 (ppm)	2.4574	3.43691	6.13876	47.4846
				CO2 (ppm)	537.131	1039.2	739.954	813.72
				N2O (ppb)	565.825	550.297	555.287	543.933
				Temperature	25	35	34.5	33
		2016-06-13	175-1	CH4 (ppm)	2.74984	2.88184	3.06763	3.41272
				CO2 (ppm)	330.011	365.333	404.406	438.952
				N2O (ppb)	540.832	538.887	572.058	569.216
				Temperature	27	29	29	29
			175-2	CH4 (ppm)	3.22045	3.14969	3.31996	3.25985
				CO2 (ppm)	335.037	361.056	391.647	444.327
				N2O (ppb)	545.528	570.226	578.005	572.712
				Temperature	27.5	28.5	28.5	28.5
			175-3	CH4 (ppm)	4.25693	6.18604	7.1403	7.28817
				CO2 (ppm)	467.655	365.376	404.735	429.933
				N2O (ppb)	572.651	562.833	588.135	577.511
				Temperature	30	30.5	30.5	31
			170-1	CH4 (ppm)	4.18304	4.53561	3.25622	3.47687
				CO2 (ppm)	365.792	350.258	372.413	392.206
				N2O (ppb)	573.435	571.972	550.088	553.545
				Temperature	34.5	34.5	34.5	34.5
			170-2	CH4 (ppm)	3.53166	5.08935	7.56317	7.7672
				CO2 (ppm)	300.4	349.307	364.998	396.548
				N2O (ppb)	562.264	573.302	557.321	550.187
				Temperature	33	34.5	34.5	34.5
			170-3	CH4 (ppm)	3.16636	4.62278	5.08798	6.60303
				CO2 (ppm)	311.253	331.741	364.251	484.075
				N2O (ppb)	573.836	562.466	570.274	592.539
				Temperature	33	34.5	35	35
			165-1	CH4 (ppm)	3.63602	3.91584	5.58262	4.77184
				CO2 (ppm)	389.237	412.564	451.063	419.98
				N2O (ppb)	564.719	585.971	586.746	569.809
				Temperature	38	43	41	42.5
			165-2	CH4 (ppm)	7.46752	8.59294	10.1983	10.4763
				CO2 (ppm)	302.615	309.108	339.388	358.077
				N2O (ppb)	580.468	561.85	562.428	585.273
				Temperature	35.5	38	37	38
			165-3	CH4 (ppm)	4.20744	14.2982	14.6247	14.8992
				CO2 (ppm)	316.817	420.653	1643.23	355.879
				N2O (ppb)	585.469	588.699	593.692	579.431
				Temperature	36	40	40	42
		2016-07-05	175-1	CH4 (ppm)	2.64018	3.02287	3.597	2.89497
				CO2 (ppm)	328.823	365.577	371.879	393.779
				N2O (ppb)	571.276	579.063	568.733	570.925
				Temperature	30.5	31.5	31.5	32.5
			175-2	CH4 (ppm)	2.92396	3.19927	3.31816	3.26132
				CO2 (ppm)	327.94	377.6	396.961	397.473
				N2O (ppb)	571.95	580.624	572.707	570.938
				Temperature	29.5	29.5	29.5	29.5
			175-3	CH4 (ppm)	3.04985	3.27134	2.77999	2.68541
				CO2 (ppm)	422.625	378.783	432.504	477.165
				N2O (ppb)	579.085	568.073	577.606	574.569
				Temperature	28.5	28.5	28.5	28.5
			170-1	CH4 (ppm)	2.83554	2.48735	2.46251	2.54921
				CO2 (ppm)	347.415	374.64	377.241	416.033
				N2O (ppb)	573.787	552.14	570.494	542.089
				Temperature	33.5	34.5	33	32.5
			170-2	CH4 (ppm)	2.73476	3.35749	3.69953	3.21996
				CO2 (ppm)	310.659	356.213	364.331	379.101
				N2O (ppb)	537.561	599.558	566.484	545.247
				Temperature	29	29	29.5	30
			170-3	CH4 (ppm)	2.78141	2.60156	2.67857	2.74675
				CO2 (ppm)	325.825	328.178	340.47	354.747
				N2O (ppb)	571.474	570.538	568.994	567.33
				Temperature	32	32.5	32.5	32.5
			165-1	CH4 (ppm)	2.2659	2.5518	2.35592	2.7612
				CO2 (ppm)	300.586	334.396	482.253	398.89
				N2O (ppb)	573.242	573.023	576.102	605.192
				Temperature	36	38	38.5	38.5
			165-2	CH4 (ppm)	9.59703	28.5339	35.2009	33.837
				CO2 (ppm)	304.461	347.203	371.87	377.424
				N2O (ppb)	570.316	573.766	571.814	567.793
				Temperature	33	33.5	33.5	33.5
			165-3	CH4 (ppm)	6.08712	5.87324	4.67539	5.2199
				CO2 (ppm)	339.677	406.959	383.42	524.835
				N2O (ppb)	564.849	536.297	540.442	568.216
				Temperature	34	33.8	33	33
		2016-07-21	175-1	CH4 (ppm)	3.41294	4.23547	4.39161	5.23818
				CO2 (ppm)	360.09	1074.47	417.009	465.718
				N2O (ppb)	551.222	559.251	565.158	558.451
				Temperature	28	28	28.2	28.2
			175-2	CH4 (ppm)	4.33572	5.42388	6.78424	7.53488
				CO2 (ppm)	374.187	491.429	434.607	445.748
				N2O (ppb)	550.311	575.434	564.073	585.606
				Temperature	27	27	27	27.2
			175-3	CH4 (ppm)	2.90731	3.58491	3.51316	4.55284
				CO2 (ppm)	371.133	394.355	664.376	442.929
				N2O (ppb)	553.684	550.848	554.698	553.37
				Temperature	28.5	29	29	29.5
			170-1	CH4 (ppm)	5.97424	5.97498	2.95539	4.08539
				CO2 (ppm)	333.724	365.886	487.956	386.042
				N2O (ppb)	551.048	565.999	558.734	559.161
				Temperature	31	31.2	31	31.2
			170-2	CH4 (ppm)	5.02777	8.50221	10.2913	13.7425
				CO2 (ppm)	374.322	368.592	397.802	402.881
				N2O (ppb)	560.14	559.163	569.219	556.201
				Temperature	28	28	28.5	28.5
			170-3	CH4 (ppm)	4.03653	3.68291	3.69057	2.76574
				CO2 (ppm)	353.443	409.623	423.928	444.29
				N2O (ppb)	548.958	549.444	548.512	529.838
				Temperature	28	28.5	28.8	29
			165-1	CH4 (ppm)	2.74071	3.20074	2.72069	2.72294
				CO2 (ppm)	341.058	538.409	414.199	392.876
				N2O (ppb)	573.695	573.485	589.126	572.098
				Temperature	32	34.5	36.5	38
			165-2	CH4 (ppm)	5.18644	5.73623	5.79585	5.62682
				CO2 (ppm)	453.913	437.348	473.868	494.392
				N2O (ppb)	531.286	570.48	576.157	560.86
				Temperature	30	30.5	30.2	30.2
			165-3	CH4 (ppm)	49.0535	58.0548	66.0223	67.6593
				CO2 (ppm)	354.215	373.163	405.157	480.416
				N2O (ppb)	561.403	562.477	556.664	552.654
				Temperature	30	31	30.5	30.5
		2016-08-16	175-1	CH4 (ppm)	2.44663	2.46521	2.45987	2.44346
				CO2 (ppm)	607.886	938.42	1146.95	1523.45
				N2O (ppb)	350.879	377.42	391.484	398.116
				Temperature	35.5	39.5	40.5	41
			175-2	CH4 (ppm)	2.47278	2.44643	2.52468	2.44416
				CO2 (ppm)	591.614	794.886	911.851	1123.44
				N2O (ppb)	353.069	362.451	368.112	383.01
				Temperature	34	38	39	40.5
			175-3	CH4 (ppm)	2.4072	2.39052	2.41085	2.39763
				CO2 (ppm)	636.303	841.12	1101.95	1373.16
				N2O (ppb)	358.702	389.897	450.318	514.64
				Temperature	36	40.5	42	45
			170-1	CH4 (ppm)	2.22016	2.19914	2.23659	2.23955
				CO2 (ppm)	510.499	829.35	830.729	985.64
				N2O (ppb)	337.548	337.857	339.11	348.211
				Temperature	42	46	48	49.8
			170-2	CH4 (ppm)	2.22938	2.23674	2.23259	2.39322
				CO2 (ppm)	502.889	667.156	921.56	1301.59
				N2O (ppb)	337.715	378.168	447.89	468.963
				Temperature	42.3	47	48.7	50
			170-3	CH4 (ppm)	2.20872	2.18949	2.23413	2.19086
				CO2 (ppm)	507.625	618.273	727.453	836.17
				N2O (ppb)	344.121	342.934	341.984	340.499
				Temperature	40	45	45.5	47
			165-1	CH4 (ppm)	2.20931	2.42372	2.20034	2.21302
				CO2 (ppm)	470.799	658.648	1109.68	2754.38
				N2O (ppb)	331.798	344.475	359.988	382.834
				Temperature	40.5	50.5	51.8	54
			165-2	CH4 (ppm)	2.19598	2.34445	2.1449	2.21638
				CO2 (ppm)	567.835	858.13	1122.07	1103.62
				N2O (ppb)	337.517	342.716	343.232	349.154
				Temperature	42.5	53	54	54.5
			165-3	CH4 (ppm)	2.13923	2.27676	2.39105	2.41704
				CO2 (ppm)	478.418	957.035	841.195	958.662
				N2O (ppb)	336.669	335.466	339.123	335.76
				Temperature	46.5	51	51.5	52.5

## Sheet: Diurnal variations of GHGs
land uses	Date	time	testing data	①0min	②10min	③20min	④30min	GHGs flux=ρ*V/A*P/P0*273/(273+T)*dc/dt
Dry lands	2015-09-07	08:00:00	CH4 (ppm)	2.81463	2.44638	2.55686	2.46502	ρ is the concentration of GHG in standard atmospheric condition.ρCO2 (kg•m-3) and N2O (mg•m-3) are 1.96 ppm and ρCH4 (kg•m-3):0.717 ppm.
			CO2 (ppm)	556.016	718.058	964.031	1113.04	V(m3)is the air volume in the chamber;
			N2O (ppb)	383.675	382.08	389.981	375.638	A(m2)is the soil surface area in the chamber;
			Temperature	26.5	26.8	27	27	P(Pa)is atmospheric pressure
		10:00:00	CH4 (ppm)	2.90669	2.9139	2.76028	2.44183	T(OC) is the air temperature in the chamber;
			CO2 (ppm)	1014.02	1133.89	1044.26	1377.91	dc/dt is concentration changes in chamber per unit time
			N2O (ppb)	398.624	392.333	391.311	383.905
			Temperature	33.5	33.5	39	38.5
		12:00:00	CH4 (ppm)	2.5187	2.51959	2.61897	2.63261
			CO2 (ppm)	559.995	687.733	921.601	1057.53
			N2O (ppb)	384.908	391.695	386.543	387.549
			Temperature	36.5	37	37.5	37.5
		14:00:00	CH4 (ppm)	3.16291	3.28902	3.26484	2.62207
			CO2 (ppm)	838.134	610.118	948.102	1294.21
			N2O (ppb)	395.252	380.24	376.776	368.138
			Temperature	39	39	37	38
		16:00:00	CH4 (ppm)	2.70127	2.3876	2.51216	2.86077
			CO2 (ppm)	466.296	764.838	962.019	1213.8
			N2O (ppb)	398.266	376.442	376.128	382.65
			Temperature	46	43.5	40	38
		18:00:00	CH4 (ppm)	2.71125	2.68386	3.13784	2.66234
			CO2 (ppm)	1059.63	814.357	954.898	1187.62
			N2O (ppb)	383.747	387.784	422.225	389.814
			Temperature	31	31	29	29.5
		20:00:00	CH4 (ppm)	2.72711	2.61309	2.56429	2.28012
			CO2 (ppm)	550.676	805.611	866.168	1125.86
			N2O (ppb)	383.766	392.325	364.393	444.371
			Temperature	26.5	27.5	27	27
		22:00:00	CH4 (ppm)	2.62152	2.51781	2.29676	2.51038
			CO2 (ppm)	564.437	686.773	901.803	1070.24
			N2O (ppb)	397.857	388.664	383.539	356.317
			Temperature	26	26.5	26.5	26.5
		00:00:00	CH4 (ppm)	2.33824	2.58736	2.34966	2.38549
			CO2 (ppm)	570.846	707.532	1004.45	1165.52
			N2O (ppb)	376.936	381.546	380.065	400.378
			Temperature	25	25.5	25.5	25.5
		02:00:00	CH4 (ppm)	2.41167	2.79388	2.55142	2.78889
			CO2 (ppm)	705.256	814.977	979.697	1313.39
			N2O (ppb)	388.69	393.063	377.676	375.676
			Temperature	25	25	25	25
		04:00:00	CH4 (ppm)	2.64026	2.54388	2.49674	2.6081
			CO2 (ppm)	697.455	895.874	952.886	1180.86
			N2O (ppb)	399.131	380.392	384.889	388.376
			Temperature	24	24.5	24.5	24.5
		06:00:00	CH4 (ppm)	2.46768	2.5136	2.44727	2.92188
			CO2 (ppm)	654.73	796.494	920.579	1104.82
			N2O (ppb)	396.875	383.356	369.652	361.883
			Temperature	23.5	23.5	24	24
	2016.5.11	08:00:00	CH4 (ppm)	2.46678	2.52811	2.46749	2.44212
			CO2 (ppm)	548.184	666.796	799.822	974.479
			N2O (ppb)	358.689	378.713	378.33	398.174
			Temperature	23.5	24	24	24.5
		10:00:00	CH4 (ppm)	2.24753	2.18436	2.2618	2.41403
			CO2 (ppm)	654.115	647.188	1195.55	1543.76
			N2O (ppb)	357.53	373.777	423.377	448.324
			Temperature	32.5	31	34	38.5
		12:00:00	CH4 (ppm)	2.35408	2.72536	2.1442	2.18832
			CO2 (ppm)	801.621	748.809	855.774	1856.13
			N2O (ppb)	365.598	412.664	435.798	517.143
			Temperature	36.5	40.5	41	42
		14:00:00	CH4 (ppm)	3.0673	2.84008	2.67194	2.31154
			CO2 (ppm)	1125.33	1455.37	1567.5	1737.27
			N2O (ppb)	362	399.749	447.541	508.528
			Temperature	39	43.5	41	40.5
		16:00:00	CH4 (ppm)	2.44079	2.5	2.60961	2.3557
			CO2 (ppm)	653.174	941.519	1219.82	2145.69
			N2O (ppb)	348.71	381.137	425.207	487.942
			Temperature	38	39.5	40	40
		18:00:00	CH4 (ppm)	2.59143	2.4051	2.47873	2.17602
			CO2 (ppm)	822.978	1406.25	1798.53	1322.44
			N2O (ppb)	382.571	405.023	448.934	502.934
			Temperature	36	36	39.5	39
		20:00:00	CH4 (ppm)	2.47958	2.42244	2.24571	2.23548
			CO2 (ppm)	591.406	790.526	900.596	1119.92
			N2O (ppb)	387.517	397.428	439.865	487.475
			Temperature	25	25	25	25
		22:00:00	CH4 (ppm)	2.54349	2.67347	2.38122	2.59552
			CO2 (ppm)	581.846	773.125	1028.08	1086.31
			N2O (ppb)	380.476	412.414	458.148	467.768
			Temperature	22	23	23	23
		00:00:00	CH4 (ppm)	2.33315	2.79683	2.49668	2.67262
			CO2 (ppm)	538.928	727.838	844.717	989.94
			N2O (ppb)	374.311	396.777	427.698	453.969
			Temperature	21	21.5	21.5	21.5
		02:00:00	CH4 (ppm)	2.27672	2.30485	2.38333	2.54299
			CO2 (ppm)	570.43	680.081	734.943	972.441
			N2O (ppb)	383.33	403.436	401.927	461.03
			Temperature	20	20	20	20.5
		04:00:00	CH4 (ppm)	2.39818	2.73019	2.45591	2.69352
			CO2 (ppm)	567.565	667.627	854.426	991.046
			N2O (ppb)	381.429	367.161	415.01	436.901
			Temperature	20	20	20	20
		06:00:00	CH4 (ppm)	2.52499	2.89717	2.68417	2.64028
			CO2 (ppm)	598.399	761.713	907.873	1087.49
			N2O (ppb)	368.915	383.196	408.31	444.021
			Temperature	19.5	19.5	20	20
	2016.7.20	08:00:00	CH4 (ppm)	2.29618	2.29912	2.29165	2.40007
			CO2 (ppm)	389.798	562.766	622.491	673.646
			N2O (ppb)	553.247	576.772	586.834	588.884
			Temperature	27	27	27.5	27.8
		10:00:00	CH4 (ppm)	2.26055	2.24955	2.4611	2.39502
			CO2 (ppm)	338.557	413.395	476.671	580.934
			N2O (ppb)	576.907	603.493	625.802	670.613
			Temperature	30	35.6	36.8	38
		12:00:00	CH4 (ppm)	3.00085	2.32239	2.6218	2.4367
			CO2 (ppm)	351.203	437.35	532.26	622.341
			N2O (ppb)	565.094	609.259	624.774	671.216
			Temperature	38	44	45.7	46
		14:00:00	CH4 (ppm)	2.21658	2.24999	2.30383	2.24345
			CO2 (ppm)	358.451	427.699	569.215	651.784
			N2O (ppb)	550.792	603.513	665.229	672.194
			Temperature	41	45	44	43.5
		16:00:00	CH4 (ppm)	2.66746	2.39903	2.40599	2.45113
			CO2 (ppm)	290.541	355.059	443.366	548.661
			N2O (ppb)	578.679	587.594	612.429	635.064
			Temperature	36.7	38	38.3	38
		18:00:00	CH4 (ppm)	2.73899	2.2351	2.32326	2.39052
			CO2 (ppm)	298.565	347.51	443.503	506.123
			N2O (ppb)	562.14	596.671	608.145	611.489
			Temperature	33.5	34	33.5	33.5
		20:00:00	CH4 (ppm)	2.4461	2.30435	2.79941	2.68554
			CO2 (ppm)	422.297	491.35	579.037	423.816
			N2O (ppb)	585.623	603.017	714.692	591.161
			Temperature	29	29.5	29	29.5
		22:00:00	CH4 (ppm)	2.64177	3.06107	3.44165	3.36712
			CO2 (ppm)	481.936	544.505	620.327	682.239
			N2O (ppb)	612.072	627.168	652.978	650.057
			Temperature	27.5	27.5	27.5	27.5
		00:00:00	CH4 (ppm)	2.84099	2.72868	2.84488	2.85022
			CO2 (ppm)	406.949	497.045	517.305	607.295
			N2O (ppb)	610.91	617.879	630.919	628.511
			Temperature	26.5	27	27	26.5
		02:00:00	CH4 (ppm)	2.485	2.55549	2.5701	2.66755
			CO2 (ppm)	417.59	441.1	483.233	497.439
			N2O (ppb)	563.22	584.776	577.47	613.45
			Temperature	26	26	26	26
		04:00:00	CH4 (ppm)	2.851	3.31138	3.06402	2.60452
			CO2 (ppm)	440.664	503.358	545.748	584.89
			N2O (ppb)	611.244	621.226	625.283	636.833
			Temperature	25.5	25.5	25.5	25.5
		06:00:00	CH4 (ppm)	2.70079	2.86664	2.84818	3.45228
			CO2 (ppm)	472.911	479.731	558.44	552.431
			N2O (ppb)	595.576	609.021	629.016	624.455
			Temperature	24.6	25	25.2	27
	2016.9.1	08:00:00	CH4 (ppm)	2.35002	2.36894	2.3794	2.3513
			CO2 (ppm)	602.841	581.316	660.584	741.555
			N2O (ppb)	343.201	361.19	397.972	452.522
			Temperature	25.5	26.5	27.2	28
		10:00:00	CH4 (ppm)	2.35403	2.3499	2.34692	2.41622
			CO2 (ppm)	539.847	973.795	774.623	863.464
			N2O (ppb)	321.134	361.58	418.641	454.663
			Temperature	29.5	32.2	33.5	34
		12:00:00	CH4 (ppm)	2.34459	2.29418	2.32943	2.32081
			CO2 (ppm)	483.441	673.596	681.707	935.825
			N2O (ppb)	344.389	364.337	405.415	493.818
			Temperature	38	38	40.5	40.5
		14:00:00	CH4 (ppm)	2.26968	2.29829	2.247	2.30989
			CO2 (ppm)	502.163	573.084	2429.59	1711.75
			N2O (ppb)	334.664	380.228	466.046	574.155
			Temperature	41.5	47	46	47.5
		16:00:00	CH4 (ppm)	2.22801	2.37573	2.2097	2.26257
			CO2 (ppm)	448.656	609.662	793.697	934.868
			N2O (ppb)	335.766	372.494	466.482	550.086
			Temperature	40.5	42.2	41	41
		18:00:00	CH4 (ppm)	2.22136	2.15741	2.29596	2.24147
			CO2 (ppm)	552.302	505.93	748.657	854.021
			N2O (ppb)	334.009	373.179	467.866	563.012
			Temperature	32	32.5	32	31
		20:00:00	CH4 (ppm)	2.29015	2.32654	2.28388	2.29007
			CO2 (ppm)	591.384	663.166	727.172	870.562
			N2O (ppb)	341.548	411.922	465.416	554.511
			Temperature	27	27	26	25.5
		22:00:00	CH4 (ppm)	2.37961	2.35447	2.4302	2.48883
			CO2 (ppm)	563.27	659.434	794.185	892.709
			N2O (ppb)	341.679	404.527	461.46	524.629
			Temperature	25	25	25	25
		00:00:00	CH4 (ppm)	2.59183	2.39149	2.68399	2.43862
			CO2 (ppm)	522.494	637.231	712.642	863.245
			N2O (ppb)	337.042	384.659	434.161	499.902
			Temperature	24	24	24	24
		02:00:00	CH4 (ppm)	2.46935	2.48109	2.521	2.46123
			CO2 (ppm)	580.213	645.852	764.928	851.767
			N2O (ppb)	343.352	406.056	441.452	496.858
			Temperature	23	23	23	23
		04:00:00	CH4 (ppm)	2.51935	2.49041	2.54581	2.49123
			CO2 (ppm)	599.806	693.813	764.928	871.143
			N2O (ppb)	346.457	389.058	428.948	472.077
			Temperature	22.8	22.8	22.8	22.8
		06:00:00	CH4 (ppm)	2.87103	2.58294	2.72679	2.66295
			CO2 (ppm)	610.72	713.236	803.684	839.055
			N2O (ppb)	336.634	386.087	434.339	455.559
			Temperature	23.2	23.2	23.2	23.2
Paddy fields	2015-09-07	08:00:00	CH4 (ppm)	2.52846	30.2569	2.59579	2.81208
			CO2 (ppm)	541.217	509.484	561.357	662.377
			N2O (ppb)	314.294	497.097	653.918	846.515
			Temperature	25	25	25	25
		10:00:00	CH4 (ppm)	2.65413	2.90669	2.44982	2.44672
			CO2 (ppm)	571.248	623.43	594.112	592.502
			N2O (ppb)	289.144	385.218	526.57	577.455
			Temperature	28	28.5	28.5	28.5
		12:00:00	CH4 (ppm)	2.67088	34.3451	3.02581	2.4882
			CO2 (ppm)	623.198	529.484	928.923	806.617
			N2O (ppb)	257.172	443.848	516.28	570.025
			Temperature	36.5	38	38	37
		14:00:00	CH4 (ppm)	2.72168	2.79377	2.72922	2.43152
			CO2 (ppm)	567.363	1123.44	942.669	1348.44
			N2O (ppb)	321.837	438.534	506.171	565.724
			Temperature	46.5	47	46.5	46.5
		16:00:00	CH4 (ppm)	3.13573	2.37817	3.15791	3.07805
			CO2 (ppm)	614.824	1312.8	882.763	1418.61
			N2O (ppb)	309.903	339.241	278.584	377.72
			Temperature	39	45	47	45
		18:00:00	CH4 (ppm)	2.67631	2.73321	2.75384	2.96769
			CO2 (ppm)	811.463	1613.67	1951.45	650.257
			N2O (ppb)	325.529	357.884	414.51	402.982
			Temperature	45	47.5	48	48
		20:00:00	CH4 (ppm)	2.86376	2.73565	2.78424	2.84546
			CO2 (ppm)	483.184	618.26	538.617	686.185
			N2O (ppb)	333.455	386.388	424.44	587.857
			Temperature	37	36	35	29
		22:00:00	CH4 (ppm)	2.91645	2.73199	2.39736	2.2241
			CO2 (ppm)	544.701	656.511	544.979	579.762
			N2O (ppb)	335.639	501.533	787.592	1169.61
			Temperature	30	30	30	30
		00:00:00	CH4 (ppm)	3.03957	2.58414	2.44727	2.38893
			CO2 (ppm)	522.998	551.806	861.787	596.527
			N2O (ppb)	286.825	491.829	773.092	1093.49
			Temperature	28.5	29	29	29
		02:00:00	CH4 (ppm)	2.39081	2.40446	2.32881	2.87752
			CO2 (ppm)	530.01	575.644	649.127	745.813
			N2O (ppb)	283.177	592.698	922.347	1040.42
			Temperature	28	27.5	27.5	27.5
		04:00:00	CH4 (ppm)	2.84846	2.3978	2.51071	2.70637
			CO2 (ppm)	830.905	684.993	578.106	598.647
			N2O (ppb)	286.217	526.007	824.653	1035.83
			Temperature	26.5	26.5	26.5	26.5
		06:00:00	CH4 (ppm)	2.4567	2.38305	2.72656	2.47711
			CO2 (ppm)	588.044	522.766	593.586	676.371
			N2O (ppb)	320.891	557.371	770.593	1005.97
			Temperature	26	26	26	26
	2016.5.11	08:00:00	CH4 (ppm)	2.52546	2.59267	2.6031
			CO2 (ppm)	559.973	630.254	516.837	536.865
			N2O (ppb)	353.232	358.071	352.354	345.459
			Temperature	25	28	30	32
		10:00:00	CH4 (ppm)	2.66177	2.48014	2.98975	2.63458
			CO2 (ppm)	593.974	625.992	570.181	492.324
			N2O (ppb)	363.382	370.861	362.156	388.378
			Temperature	33.5	37.5	39	40
		12:00:00	CH4 (ppm)	2.1612	2.22211	11.0115	10.9006
			CO2 (ppm)	1512.77	1228.79	1653.28	1327.87
			N2O (ppb)	366.335	375	388.046	399.855
			Temperature	37	42.5	43.5	44
		14:00:00	CH4 (ppm)	2.15065	2.2684	2.53429	4.41609
			CO2 (ppm)	672.582	1874.32	1458.79	778.616
			N2O (ppb)	350.065	390.229	394.003	394.503
			Temperature	39.5	45	47	47
		16:00:00	CH4 (ppm)	3.50946	2.85372	3.63944	3.46747
			CO2 (ppm)	1436.6	557.449	1491.39	1695.3
			N2O (ppb)	356.155	381.963	384.441	387.314
			Temperature	42	46	46.5	47
		18:00:00	CH4 (ppm)	2.57607	2.8191	3.18479	3.13631
			CO2 (ppm)	942.138	474.246	915.058	481.334
			N2O (ppb)	345.298	366.283	392.34	390.346
			Temperature	36	38.5	39	38
		20:00:00	CH4 (ppm)	2.31234	2.67193	2.84226	3.55339
			CO2 (ppm)	509.543	563.937	798.981	516.941
			N2O (ppb)	368.262	368.154	376.269	390.891
			Temperature	26.5	27	27	27
		22:00:00	CH4 (ppm)	2.45386	2.73379	2.85711	3.09071
			CO2 (ppm)	531.012	568.424	575.728	580.206
			N2O (ppb)	364.255	386.053	387.768	381.545
			Temperature	24.5	24.5	24.5	24.5
		00:00:00	CH4 (ppm)	2.41443	3.01881	2.95332	3.6437
			CO2 (ppm)	499.804	568.637	538.241	548.388
			N2O (ppb)	354.83	361.806	385.313	371.812
			Temperature	22.5	23	23	23
		02:00:00	CH4 (ppm)	2.41577	2.88179	3.07575	3.20588
			CO2 (ppm)	531.936	553.067	563.681	577.285
			N2O (ppb)	361.531	367.084	379.199	379.859
			Temperature	22	22	22	22
		04:00:00	CH4 (ppm)	2.3933	2.93889	2.82174	3.43121
			CO2 (ppm)	558.938	681.293	572.937	594.328
			N2O (ppb)	405.655	372.869	362.101	373.413
			Temperature	20.5	20.5	20.5	20.5
		06:00:00	CH4 (ppm)	2.60306	3.20783	2.95372	3.73077
			CO2 (ppm)	650.577	567.818	554.986	582.466
			N2O (ppb)	369.195	358.775	351.385	351.363
			Temperature	20	20	20	21
	2016.7.20	08:00:00	CH4 (ppm)	2.39837	2.35071	3.46436	2.63835
			CO2 (ppm)	381.905	454.477	370.45	412.397
			N2O (ppb)	582.782	565.83	571.253	603.873
			Temperature	27.5	27.5	27.5	27.5
		10:00:00	CH4 (ppm)	2.30113	2.82515	2.44874	2.39419
			CO2 (ppm)	307.013	351.1	344.818	360.263
			N2O (ppb)	570.211	592.537	584.445	580.406
			Temperature	36	36	35.5	35
		12:00:00	CH4 (ppm)	2.34142	2.58382	2.80666	2.22496
			CO2 (ppm)	317.702	346.242	361.193	367.921
			N2O (ppb)	544.027	588.713	572.269	562.073
			Temperature	36.5	44.5	45.6	46
		14:00:00	CH4 (ppm)	2.46475	2.57139	2.33293	2.34797
			CO2 (ppm)	282.518	317.877	328.986	350.964
			N2O (ppb)	539.735	583.058	588.633	640.116
			Temperature	37	39.5	40	39.5
		16:00:00	CH4 (ppm)	2.42883	2.56387	2.72047	3.1836
			CO2 (ppm)	306.359	334.315	335.304	355.276
			N2O (ppb)	581.142	584.29	597.238	589.35
			Temperature	35	36	36	35.5
		18:00:00	CH4 (ppm)	2.69592	2.48536	2.515	2.7654
			CO2 (ppm)	284.657	312.651	326.181	342.201
			N2O (ppb)	579.501	584.801	588.347	588.019
			Temperature	33	33.5	33	33
		20:00:00	CH4 (ppm)	4.01888	3.36298	2.93392	2.66898
			CO2 (ppm)	352.503	377.501	397.519	650.352
			N2O (ppb)	601.805	596.32	696.025	635.499
			Temperature	30.5	30	30.5	30.5
		22:00:00	CH4 (ppm)	3.63525	3.27282	2.84783	3.22504
			CO2 (ppm)	410.58	442.875	430.446	476.58
			N2O (ppb)	605.898	600.309	578.109	610.198
			Temperature	28	29	29	29
		00:00:00	CH4 (ppm)	2.60632	3.23195	2.73603	2.67245
			CO2 (ppm)	394.056	401.173	425.402	414.516
			N2O (ppb)	579.692	594.841	608.103	584.982
			Temperature	28	28	28.2	28.2
		02:00:00	CH4 (ppm)	3.01569	3.19815	3.78936	3.46693
			CO2 (ppm)	408.597	417.071	448.214	474.646
			N2O (ppb)	594.712	590.327	596.177	590.833
			Temperature	27	27.5	27.5	27.5
		04:00:00	CH4 (ppm)	3.02037	3.52218	3.18208	3.52425
			CO2 (ppm)	416.712	441.212	469.571	488.528
			N2O (ppb)	603.711	603.067	593.386	576.598
			Temperature	26.5	26.8	26.8	27
		06:00:00	CH4 (ppm)	2.93878	2.80767	2.73558	2.91942
			CO2 (ppm)	435.491	461.088	482.42	524.131
			N2O (ppb)	594.96	604.059	606.788	599.601
			Temperature	25.5	26.2	26.8	27.5
	2016.9.1	08:00:00	CH4 (ppm)	2.32671	2.3206	2.32918	2.3266
			CO2 (ppm)	495.837	588.455	688.934	743.586
			N2O (ppb)	345.41	343.978	342.835	343.926
			Temperature	26.3	27	27.8	28.5
		10:00:00	CH4 (ppm)	2.37955	2.45789	2.42256	2.43606
			CO2 (ppm)	496.057	550.433	602.737	759.241
			N2O (ppb)	346.162	344.601	344.575	346.476
			Temperature	30	31.7	32.5	33.2
		12:00:00	CH4 (ppm)	2.31151	2.29517	2.55327	2.36589
			CO2 (ppm)	459.679	525.708	701.722	735.746
			N2O (ppb)	341.09	341.877	341.537	349.76
			Temperature	36	38.5	39	39.5
		14:00:00	CH4 (ppm)	2.31151	2.3065	2.30644	2.3027
			CO2 (ppm)	459.679	1019.12	1670.52	2161.56
			N2O (ppb)	341.09	343.233	324.354	349.65
			Temperature	43	46.5	45.5	47
		16:00:00	CH4 (ppm)	2.25719	2.24754	2.28341	2.36353
			CO2 (ppm)	426.274	1026.19	607.687	1748.22
			N2O (ppb)	339.401	340.754	344.923	346.7
			Temperature	38	40	38.5	39
		18:00:00	CH4 (ppm)	2.54826	2.2899	2.26595	2.26066
			CO2 (ppm)	507.351	849.259	638.619	693.722
			N2O (ppb)	342.35	345.959	330.524	345.478
			Temperature	32.5	33	32.5	31.5
		20:00:00	CH4 (ppm)	2.49544	2.49831	2.52571	2.46158
			CO2 (ppm)	597.975	623.821	657.034	749.709
			N2O (ppb)	352.181	354.774	361.443	353.748
			Temperature	27	27	26	26
		22:00:00	CH4 (ppm)	2.49544	2.49831	2.52571	2.46158
			CO2 (ppm)	597.975	623.821	657.034	749.709
			N2O (ppb)	352.181	354.774	361.443	353.748
			Temperature	25	25	25	25
		00:00:00	CH4 (ppm)	2.47232	2.48675	2.58182	2.44494
			CO2 (ppm)	568.589	629.742	966.087	816.15
			N2O (ppb)	340.899	347.541	343.202	345.656
			Temperature	24	24	24.5	24.5
		02:00:00	CH4 (ppm)	2.46	2.45654	2.5	2.3865
			CO2 (ppm)	570.034	645.373	698.512	826.312
			N2O (ppb)	343.723	348.084	345.651	346.4
			Temperature	23.5	23.5	23.5	23.5
		04:00:00	CH4 (ppm)	2.54759	2.5781	2.89782	2.49575
			CO2 (ppm)	580.026	648.773	578.692	775.262
			N2O (ppb)	345.671	349.076	346.935	347.734
			Temperature	23	23	23	23
		06:00:00	CH4 (ppm)	2.81394	2.62952	2.60941	2.65853
			CO2 (ppm)	499.784	600.843	648.208	690.376
			N2O (ppb)	343.292	350.105	347.957	346.037
			Temperature	23.5	23.5	24	24

## Sheet: enviromental parameters
land uses	Year	Date	Eelevation(m)	CH4 (mg•m-3)	CO2 (mg•m-3)	N2) (µg•m-3)	Soil volumitic water content(%)	Soil mass water content (%)	Air temperature	Soil Temperature	NO3--N(mg/kg)	NH4+-N(mg/kg)	TC (g/kg)	TN (g/kg)	DOC (g/kg)
Different elevations
Paddy fields	2015	2015-04-14	175	0.16873	5.79346	20.6696	77.3	75.5958	26	16.7	2.62101	6.0203	15.5604	1.48384	--
		2015-05-06	175	0.261279	42.0826	-41.0737	77.3	51.5659	40	22.88	6.71941	7.4567	18.995	1.605	--
		2015-05-20	175	1.40664	124.423	19.9602	77.3	80.075	30	26	1.89636	12.1696	19.0836	1.85644	--
		2015-06-16	175	5.49895	271.8	56.277	77.3	74.3284	28	24.5	0.463434	6.75191	17.288	1.60229	--
		2015-07-23	175	4.7727	302.873	204.069	75.9	66.5749	28	28	0.000284974	15.5883	20.8152	1.92041	--
		2015-08-20	175	-0.000629255	342.071	47.2888	76.28	49.925	25.5	25	11.7897	44.5465	19.4143	1.74532	--
		2015-09-08	175	0.0511484	33.0083	21.6248	77.3	60.2564	25	26	12.3745	157.272	19.9711	1.83663	--
		2015-09-23	175	0.0407821	315.581	-25.2894	77.3	69.7793	26	26	11.6429	50.4457	21.5301	1.97821	--
		2015-04-14	170	-0.033525	5.92917	14.3498	77.3	57.3911	30	18	12.7499	6.61078	20.2208	1.89561	--
		2015-05-06	170	-0.0428372	27.5216	22.1935	77.3	57.9512	36	25	7.17341	5.45122	16.2202	1.6388	--
		2015-05-20	170	1.63623	11.5987	15.198	77.3	63.7861	34	27	47.9105	8.55905	17.8	1.69	--
		2015-06-16	170	-0.86954	338.466	4.13358	77.3	57.1761	26.5	25	0.680529	6.25242	15.4	1.52	--
		2015-07-23	170	8.4699	17.1268	17.5443	77.3	54.6183	31	28	0.273064	9.55094	15.8566	1.62449	--
		2015-08-20	170	0.0276988	187.045	10.3839	77.3	28.041	25.5	25.8	39.0803	34.6191	15.556	1.56411	--
		2015-09-08	170	-0.0736416	410.539	28.6135	77.3	59.2357	27	27	21.0906	57.7826	10.5984	1.04994	--
		2015-09-23	170	0.0953627	-42.6241	-39.0599	77.3	52.1375	27	27	4.32882	41.1342	16.2784	1.59957	--
		2015-05-06	165	0.0291509	-52.3117	-8.82077	77.3	61.0037	35	30.8	1.61324	6.27789	13.2213	1.26678	--
		2015-05-20	165	10.1319	89.9268	-6.70912	77.3	60.7232	33	27.62	1.37299	7.1559	16.8748	1.47834	--
		2015-06-16	165	1.5838	67.7276	30.4382	77.3	94.1301	29	25	0.324707	6.34159	9.38392	0.88548	--
		2015-07-23	165	0.454984	62.9627	83.6736	77.3	56.8857	31.5	27	0.597268	8.72198	25.3217	2.06396	--
		2015-08-20	165	-0.0786468	60.7506	-3.07585	77.3	66.6667	28	26	4.39333	41.75	28.4842	2.36896	--
		2015-09-08	165	0.113744	34.7669	0.153336	77.3	78.8909	28	27	5.60475	149.284	24.3522	1.88495	--
		2015-09-23	165	0.124465	313.02	-27.7699	77.3	74.216	28	27	1.75297	43.6411	28.1157	2.24337	--
	2016	2016-04-12	175-1	0.280331	486.628	42.0035	51.3226	42.1601	33	22.425	10.3651	3.39763	21.0983	1.90275	0.452
			175-2	0.377749	415.133	35.4056	48.7667	53.4015	31	22.5667	24.2126	9.77935	24.3645	2.42114	0.42956
			175-3	0.25489	177.827	42.1413	55.1333	74.1879	30	23.2333	1.83708	8.9881	20.1979	1.86798	0.37258
		2016-04-28	175-1	0.485818	89.417	10.3158	77.8	76.3189	28	23	1.57145	11.5753	17.9128	1.44712	0.2147
			175-2	0.0390048	40.3101	1.37127	77.8	70.4145	33	22	6.35652	19.1376	19.4784	1.56798	0.25638
			175-3	0.182008	17.9475	14.2346	77.8	75.7771	33	22	1.87795	40.7451	20.9518	1.99032	0.23486
		2016-05-12	175-1	0.0818102	-69.7473	-8.71204	77.8	80.3121	35	27	1.62472	108.034	23.1535	2.27009	0.31034
			175-2	0.307191	94.3316	21.9484	77.8	75.3065	32.5	25	2.66504	94.5428	18.9723	1.82347	0.29392
			175-3	7.44584	91.4679	35.7732	77.8	52.3882	36.5	26.5	2.12	101.01	15.5495	1.83983	0.21498
		2016-05-30	175-1	-0.0536777	55.8645	19.2769	77.3	86.2818	24	23	2.74682	73.8607	20.6771	2.12292	0.25038
			175-2	0.0370128	-190.164	-6.67607	77.3	72.3404	23	24	4.97564	42.5939	15.5436	1.35502	0.2154
			175-3	0.579879	134.97	1.05534	77.3	75.3945	23	22.5	2.14836	58.4502	14.1182	1.35757	0.17812
		2016-06-13	175-1	0.16937	77.9226	25.1983	77.3	83.0384	27	26.5	1.4571	48.6059	21.0786	2.1577	0.34134
			175-2	0.0224558	76.4036	19.0406	77.3	63.7452	27.5	27	1.64392	28.8437	18.2131	1.81242	0.28106
			175-3	0.77765	-15.6149	8.43759	77.3	57.5249	30	26	1.49354	32.6077	16.0819	1.62733	0.26338
		2016-07-05	175-1	0.103212	42.4205	-2.40053	77.3	43.8	31.5	27	1.42352	19.4573	16.8985	2.16139	0.34586
			175-2	0.0878214	48.3875	-2.32471	77.3	77.9359	29.5	26.5	1.47422	9.693	21.4591	1.95784	0.27618
			175-3	-0.123482	46.2863	-0.855063	77.3	50.9814	29.5	26.5	1.4901	9.18559	19.8194	1.85743	0.2909
		2016-07-21	175-1	0.439354	-72.6287	5.88485	77.3	79.1045	28	28	1.3891	9.81493	21.6666	2.16347	0.37602
			175-2	0.857829	33.7815	20.228	77.3	90.8455	27	29	1.38176	12.8439	19.3687	1.80858	0.2866
			175-3	0.378389	103.205	0.618708	77.3	83.1502	28.5	27	1.42062	10.6685	20.1567	1.84026	0.23922
		2016-08-16	175-1	-0.00197544	1063.89	56.0817	18.45	20.0961	35.5	30	10.2472	6.40112	24.6631	2.01877	0.2145
			175-2	-0.0010578	618.989	34.513	20.375	22.7496	34	29	5.37735	5.1248	17.6625	1.58717	0.1568
			175-3	-0.000598682	505.576	108.06	28.95	31.406	36	29.2	14.2455	10.9461	26.2542	2.10496	0.21452
		2016-04-12	170-1	0.235715	513.488	23.0489	49.65	50.4256	32	25.1	29.7834	1.86528	22.8422	1.84122	0.1965
			170-2	0.0560575	519.043	15.6038	50.9667	37.7289	31.5	25	4.68766	2.11414	13.5329	1.28006	0.27682
			170-3	-0.131453	1019.07	16.1237	54.6	48.4908	29	25.2	20.6623	1.82644	19.0468	1.07435	0.17326
		2016-04-28	170-1	0.145876	-38.0154	3.05556	77.8	66.3712	34.5	23.5	1.64257	7.73626	14.5142	1.22086	0.22064
			170-2	0.0183932	52.9315	-0.0958398	77.8	69.049	36	23	2.06116	7.52268	16.5192	1.35769	0.1993
			170-3	-0.00573084	10.1859	-2.23012	77.8	58.0696	38	23	2.28487	5.73002	13.8353	1.10957	0.24012
		2016-05-12	170-1	0.101371	38.4179	20.9766	77.8	66.5372	22	24	1.82619	38.1703	13.7059	1.37724	0.24016
			170-2	-0.0104913	102.357	-3.13432	77.8	60.97	25	24.25	1.69	42.46	13.63	1.29	0.22
			170-3	0.14559	-3.64238	44.4008	77.8	55.0992	24	24	1.59024	46.7538	13.5541	1.20678	0.19622
		2016-05-30	170-1	0.032768	6.27917	0.965373	77.3	75.7026	28	23.5	1.80739	42.3004	15.6922	1.4157	0.26064
			170-2	0.532429	60.7364	-1.59844	77.3	66.8521	26	22.5	1.43525	3.92102	18.9405	2.01641	0.22902
			170-3	0.265942	19.9395	-16.0087	77.3	77.0047	25.5	24	1.54631	5.86771	21.4106	2.03604	0.29886
		2016-06-13	170-1	-0.259562	21.1735	-17.0298	77.3	55.0388	34.5	26.5	1.38054	20.5116	13.8388	1.38553	0.24642
			170-2	1.16097	63.5834	-10.9158	77.3	60.1064	33	28	1.33809	28.8992	15.1067	1.41795	0.2377
			170-3	0.823402	115.098	13.3518	77.3	51.1055	33	27	1.33088	22.8623	14.0104	1.44403	0.26788
		2016-07-05	170-1	-0.0677738	43.6866	-16.0828	77.3	64.764	34.5	27	1.34942	9.538	15.9968	1.35184	0.2742
			170-2	0.139671	45.3242	-2.12691	77.3	64.0241	29	28	1.31308	4.81515	16.4386	1.32172	0.2557
			170-3	-0.00207679	20.8288	-2.93866	77.3	47.2522	32	27.5	1.32144	6.61218	14.7893	1.33023	0.24306
		2016-07-21	170-1	-0.670913	58.914	3.60532	77.3	88.3239	31	28.1	1.75614	9.47269	15.1583	1.41122	0.27634
			170-2	2.17798	23.7632	-0.0375346	77.3	66.8521	28	29.5	1.31845	4.93882	14.4631	0.864223	0.15808
			170-3	-0.296362	61.0723	-12.4114	77.3	69.4915	28	28	1.34559	6.44068	15.2413	1.41975	0.18822
		2016-08-16	170-1	0.0123529	501.878	11.6922	15.925	16.8224	42	31.5	4.88991	3.85514	16.7859	1.41263	0.16424
			170-2	0.0625576	930.713	162.746	19.85	30.0954	42.3	31.5	6.24469	5.26236	14.8458	1.30459	0.13138
			170-3	-0.00066609	221.494	-2.39055	23.025	18.624	40	33	4.43657	4.78055	15.7243	1.31921	0.15442
		2016-04-12	165-1	1.85319	170.211	10.8057	54.1	64.2428	31.5	29.2	1.83412	16.7528	23.5852	1.46208	0.21448
			165-2	0.901374	693.622	28.6699	52.5333	56.4583	30.5	25.9	2.6103	10.647	18.8905	1.7187	0.19686
			165-3	0.715933	502.956	8.24939	58.9333	61.6129	31.5	26.0667	1.56555	15.927	20.0838	1.53082	0.2156
		2016-04-28	165-1	5.97641	219.19	7.4683	71.525	64.7609	40	25.875	1.80314	12.4394	18.1129	1.55929	0.15722
			165-2	0.000226036	320.131	37.5721	69.675	46.5559	34	25	2.80013	6.94675	20.762	1.88155	0.2207
			165-3	0.41422	73.117	8.20274	72.75	74.3754	35	28.125	1.82031	19.251	24.2481	1.86739	0.19932
		2016-05-12	165-1	0.0473963	461.893	24.7272	77.8	58.1444	34	27.25	0.126711	9.25936	16.8563	1.52199	0.2556
			165-2	0.0761208	529.568	-0.276598	77.8	63.795	30.5	25.875	1.38198	26.5757	18.1525	1.82257	0.20178
			165-3	0.119877	356.062	18.6831	77.8	58.9513	32	27	1.65506	9.90266	18.7839	1.82059	0.22932
		2016-05-30	165-1	0.108032	89.0889	7.26949	77.3	65.3444	26	24.5	1.74737	41.5014	16.3872	1.57807	0.23346
			165-2	0.0238532	110.715	-12.5761	77.3	69.4915	27	25	1.60831	84.9237	18.4526	1.86876	0.26636
			165-3	1.41816	111.733	-12.7806	77.3	79.6053	25	24	1.65901	61.6136	19.9138	1.91674	0.29494
		2016-06-13	165-1	0.379412	26.7222	3.27931	77.3	54	38	28.875	1.3255	25.1636	17.6523	1.66637	0.2385
			165-2	0.805269	40.7194	3.10442	77.3	53.1568	35.5	28	1.36316	33.9778	18.8876	1.8599	0.27288
			165-3	2.43548	275.29	-2.69578	77.3	56.6215	36	28	1.3353	34.77	17.6691	1.72919	0.27148
		2016-07-05	165-1	0.0975083	91.4886	20.4417	77.3	48.5884	36	27.5	1.3527	11.3151	19.6923	1.61844	0.28812
			165-2	6.08638	51.0449	-1.99561	77.3	67.8791	33	28	1.52568	12.7648	22.1306	1.9224	0.26588
			165-3	-0.291264	111.456	2.9845	77.3	61.8868	34	27.5	1.51702	9.54484	19.6894	1.7369	0.25202
		2016-07-21	165-1	-0.0406151	6.50803	2.26009	77.3	63.9344	32	29.15	1.35754	8.37705	20.3971	1.58367	0.18956
			165-2	0.106977	33.4489	19.9897	77.3	114.531	30	29	1.43526	8.36671	21.6144	1.8427	0.16502
			165-3	4.93654	86.8681	-6.78295	77.3	87.5	30	28.5	1.45375	11.9531	20.1737	1.81229	0.16814
		2016-08-16	165-1	-0.0279195	2628.69	60.7042	14.3	21.9017	40.5	33	1.88046	4.86997	17.3845	1.52377	0.15554
			165-2	-0.0175079	648.988	12.2858	19.625	22.549	42.5	34.5	1.86564	7.47549	22.2332	1.84379	0.17054
			165-3	0.0688597	263.073	0.184662	15.9	21.5559	46.5	31.5	2.3587	6.26013	25.3854	1.84715	0.19424
Dry lands	2015	2015-05-06	180	0.291225	123.62	18.2099	60	33.8926	39	21.5	13.7951	3.5014	6.68941	0.757246	--
		2015-05-20	180	0.0178889	271.317	15.321	51.77	27.858	29	25	62.9018	3.74964	7.61887	0.910205	--
		2015-06-16	180	-0.00394109	459.486	145.874	60.7	27.9089	25	24	11.124	3.64084	7.57574	0.862544	--
		2015-07-23	180	-0.00313708	379.04	33.5091	54.4	22.2305	26.5	27	2.12157	4.62254	8.87	1.4	--
		2015-08-20	180	-0.0691313	553.577	-21.2708	42.3	22.6994	26	25	13.7703	41.7791	8.13845	0.736194	--
		2015-09-08	180	-0.0362154	317.548	166.46	59.3	18	26	26	12.2628	116.296	8.5507	0.968722	--
		2015-09-23	180	-0.00458706	488.728	18.0494	56.2	22.549	24	26	9.50248	41.7279	8.34677	0.906025	--
		2015-04-14	175	2.44293	-54.3211	14.4678	56.9	37.1402	31	17	17.6333	4.82032	24.7065	2.26987	--
		2015-05-06	175	-0.0161652	38.1523	-39.922	59.8	43.8606	37	21.8	18.9192	5.80225	28.3089	1.77216	--
		2015-05-20	175	0.139194	120.268	-8.50232	65.83	44.524	33	24.5	20.0562	7.40906	16.4255	1.6	--
		2015-06-16	175	0.100944	496.505	58.1728	57.88	38.4429	26	25	12.7565	5.01667	14.4214	1.47468	--
		2015-07-23	175	0.048778	376.866	419.259	58.73	30.9535	30	30.75	12.6788	7.82469	14.3647	1.45806	--
		2015-08-20	175	-0.19474	297.006	38.146	70.38	35.6852	25.5	25.63	41.4474	33.0902	10.884	1.08312	--
		2015-09-08	175	0.127943	381.567	-0.914061	69.2	24.533	25.5	27	24.773	51.8373	14.5476	1.53814	--
		2015-09-23	175	0.0500049	199.554	-2.13853	68.6	45.3488	25.5	27	11.1252	35.4469	15.4713	1.54806	--
		2015-04-14	170	0.353365	32.9108	11.0286	31.6	37.1689	33	16.5	30.5721	4.67324	15.7159	1.32321	--
		2015-05-06	170	0.244118	686.185	46.5659	58.85	21.7853	37	23	19.7275	2.94638	9.09483	0.946342	--
		2015-05-20	170	0.0121921	381.446	7.11774	47.2	28.2772	36	26	7.69532	4.41985	26.4605	2.18785	--
		2015-06-16	170	-0.0550628	137.612	36.4768	57.78	26.2623	29	24.5	9.20583	4.001	9.57562	1.01438	--
		2015-07-23	170	-0.0648236	303.396	0.549117	51.8	27.57	28.5	27	3.72167	5.25699	11.7143	1.02501	--
		2015-08-20	170	-0.122772	406.944	28.2383	58.8	24.533	27	27	27.4346	32.8456	14.9402	1.48371	--
		2015-09-08	170	-0.0736416	410.539	28.6135	46.6	24.533	27	26	26.9406	40.6445	17.3242	1.51928	--
		2015-09-23	170	-0.0350872	384.235	22.8149	58.6	27.3885	27.5	26	10.7174	33.5987	9.91896	0.98447	--
		2015-05-06	165	0.798396	203.867	1353.71	51.9	34.8041	38	26.5	65.44	7.73635	7.95804	0.996301	--
		2015-05-20	165	0.309439	300.3	1270.47	41.38	25.715	39	27	89.4434	4.91595	11.3647	1.38729	--
		2015-06-16	165	-0.160431	408.444	1594.14	50.9	32.8727	33	26	84.0493	5.18074	12.1241	1.62002	--
		2015-07-23	165	0.11198	475.371	246.104	31.68	20.7958	30	28	66.7287	72.6777	15.6581	1.72613	--
		2015-08-20	165	0.123728	225.828	-6.15989	37.28	29.199	29	26	57.2931	67.9587	13.4021	1.34772	--
		2015-09-08	165	0.0505885	395.423	37.0742	37.4	30.039	29	27	36.1818	42.3114	14.1129	1.35848	--
		2015-09-23	165	-0.0990636	288.933	33.9158	47.4	27.0648	29	27	12.2244	66.8361	15.7134	1.46291	--
Different land uses
Dry lands	2016	2016-04-13	170-1	0.00107598	360.708	45.2876	39.55	20.8937	30	22.2667	8.29437	2.49646	14.0002	1.17579	11.9071
			170-2	0.0285722	525.496	18.7442	29.45	19.0325	34	25.25	19.5172	2.2021	13.6975	1.17945	11.6135
			170-3	0.0856412	354.37	16.9347	53.9	37.2943	30	24	6.06335	3.61771	14.7917	1.58586	9.32725
		2016-04-29	170-1	0.199597	343.152	134.847	57.375	36.0344	25.5	22	6.7534	1.9725	14.4048	1.77468	8.11682
			170-2	0.158815	327.415	53.6359	60.1	31.6089	25.5	22	5.75051	4.86953	13.531	1.56748	8.6323
			170-3	0.0959999	591.781	59.0556	57.1	28.4062	25	22	6.57096	2.70937	12.2905	1.09082	11.2672
		2016-05-11	170-1	-0.0106768	305.244	25.7422	50	38.1852	23.5	22	14.3721	6.97144	14.1102	1.40934	10.0119
			170-2	-0.061312	644.687	67.7163	49	39.6182	32	23	4.81913	8.92161	12.2968	1.17025	10.5078
			170-3	0.0403421	64.0921	162.913	50	28.866	32	25	10.8298	8.80155	10.2853	0.994119	10.3461
		2016-05-31	170-1	0.302999	-116.838	21.3481	60.225	45.7726	26	25	7.73875	1.40146	14.8652	1.44349	10.2981
			170-2	-0.0115488	308.568	42.1287	62.2	37.4256	27.5	26	5.86186	2.10948	12.1659	1.14448	10.63
			170-3	-0.0766112	236.576	53.9403	45.225	31	28	25.5	6.81	1.91	8.89748	1.03661	8.58326
		2016-06-15	170-1	0.0376444	130.123	116.811	67.9	39.7394	29	26.5	8.09915	3.20003	14.6767	1.50036	9.78215
			170-2	0.177762	241.579	58.7429	51.15	40.9967	31	28	5.15791	2.15725	13.4209	1.25803	10.6682
			170-3	-0.0163602	542.282	55.5952	51.275	24.4923	30.5	27.5	6.40133	2.71393	9.49524	1.40504	6.75801
		2016-07-06	170-1	0.0353298	133.453	25.773	55.625	35.7919	30	27	3.59994	7.35313	14.7692	1.3336	11.0747
			170-2	0.0176623	202.028	29.3575	55.075	32.9641	29	29	6.70807	10.9961	14.8498	1.48828	9.97779
			170-3	0.0900361	206.675	8.56815	49.025	34.1529	30.5	28.5	3.10826	15.5349	12.7758	1.16796	10.9386
		2016-07-20	170-1	0.0237763	194.83	27.1462	52.75	45.7018	27	27	4.0949	3.54055	16.7565	1.39721	11.9928
			170-2	-0.0102243	67.2672	2.07328	57.125	39.1466	29.5	28.5	4.75128	3.2282	14.5179	1.37442	10.563
			170-3	-0.189441	187.353	72.2912	49.525	30.5483	34.5	28.7	2.65909	3.79896	13.6339	1.2428	10.9702
		2016-08-17	170-1	0.00164491	425.298	63.1427	25	17.3709	26.5	28.8	7.98817	6.25587	20.1746	1.49779	13.4696
			170-2	0.0191469	440.427	24.5589	16.075	14.4601	31	30.25	3.24739	3.4338	13.7596	1.11467	12.3441
			170-3	0.027122	126.94	23.3023	20.55	15.3403	38	31	13.9378	3.48328	11.3265	0.984194	11.5084
		2016-09-01	170-1	0.00164532	159.156	117.18	44.975	18.6709	25.5	25.35	10.32	4.29	15.0529	1.49743	10.0525
			170-2	-0.0606829	142.115	38.2583	25.2	15.9196	28	26	9.65	3.55	11.5351	1.22339	9.42881
			170-3	0.0545053	61.6625	1.49561	24.025	21.4083	33	28	10.01	3.84	12.9915	1.10786	11.7266
Paddy fields		2016-04-13	170-1	-0.130912	332.803	0.414657	62.325	41.4508	27	21.875	5.00088	3.96062	19.5912	1.95951	9.998
			170-2	0.329589	195.074	4.09753	67.925	57.9169	32	24.75	5.70274	4.42167	22.4579	1.98799	11.2968
			170-3	0.252034	337.248	23.352	72.075	58.1751	33.5	26	2.87875	4.46845	19.4187	1.78617	10.8717
		2016-04-29	170-1	0.0836123	203.826	103.434	54	54.8171	23.5	22.5	1.90668	5.81338	19.6236	2.05159	9.56509
			170-2	0.087875	18.6449	1.70403	54.45	57.9169	25.5	21	10.0928	27.5012	16.0906	1.3922	11.5577
			170-3	0.0739066	16.5288	83.3854	77.8	58.1751	25	23.5	4.68194	29.8318	19.697	1.43133	13.7614
		2016-05-11	170-1	0.0302028	-38.8854	-6.17817	77.3	74.029	25	22.5	1.97573	72.1611	16.7616	1.79226	9.35222
			170-2	0.154674	-14.6897	31.4585	77.8	53.1633	30	23	1.60822	45.8571	13.2762	1.28804	10.3073
			170-3	-0.0413075	-20.1184	86.9617	77.8	51.1839	36	25	1.56528	56.2328	13.4638	1.27184	10.586
		2016-05-31	170-1	0.302367	-116.594	21.3036	77.3	86.4596	25.5	26	1.47104	23.3727	14.6785	1.50264	9.7685
			170-2	-0.00562095	71.0857	-0.489988	77.3	55.6765	27.5	26.5	1.4046	29.5163	12.5671	1.25543	10.0102
			170-3	0.407816	27.433	6.91719	77.3	65.3722	28	27	1.45806	6.21799	12.927	1.30795	9.88334
		2016-06-15	170-1	-0.176685	-36.9479	-8.01035	77.3	82.1494	30	28.5	1.3284	11.0747	17.9814	1.30807	13.7465
			170-2	2.80692	76.3315	0.247707	77.3	67.2241	32.5	29	1.30197	9.94147	13.5135	1.33932	10.0899
			170-3	2.63507	44.03	-5.34506	33.7	69.9095	31	30	1.21	7.81584	13.5159	1.37671	9.81757
		2016-07-06	170-1	0.115781	58.6053	8.40691	77.3	31.3485	30	28	1.41359	10.764	15.0886	1.28983	11.6981
			170-2	0.267916	55.9851	30.3793	77.3	55.9542	31	28.5	1.35036	8.99856	15.1332	1.33984	11.2948
			170-3	0.467247	42.046	18.8383	77.3	41.4427	32.5	29	1.36559	7.92079	15.3663	1.23297	12.4628
		2016-07-20	170-1	0.143357	1.59124	14.6785	77.3	57.7287	27.5	27	1.63587	4.23502	15.9524	1.36559	11.6817
			170-2	0.214541	-15.9938	-4.68626	77.3	53.2959	28.5	27.2	1.40928	6.54573	14.4402	1.24886	11.5626
			170-3	0.66314	45.3662	6.33915	77.3	61.1171	34	28	1.33084	4.45489	19.722	1.42819	13.809
		2016-08-17	170-1	-0.0219047	619.898	33.2991	21.25	18.2499	27	29	4.4264	3.09815	19.0533	1.35529	14.0584
			170-2	-0.0231695	405.724	4.95951	23.1	16.3693	29.5	29	7.0401	5.62064	14.2997	1.27157	11.2457
			170-3	0.0157777	586.793	116.897	23.75	24.3781	39	30	7.13662	3.33333	14.5093	1.39102	10.4307
		2016-09-01	170-1	0.000781921	225.431	-0.149516	26.45	18.6709	26.3	26.5	4.99	3.89	15.7214	1.5032	10.4586
			170-2	0.896479	633.376	-4.67083	14	13.8952	28	27	4.77	3.44	14.0397	1.27131	11.0435
			170-3	-0.0257228	339.536	36.0568	19.475	21.0654	29.5	29	4.64	3.58	13.3746	1.33885	9.9896
grass fields		2016-04-29	170-1	0.352732	151.634	22.3556	33.4667	40.4007	25	21	8.18792	3.20114	19.7721	1.42938	13.8327
			170-2	0.135064	52.8467	5.38448	54.45	69.4915	25.5	21	8.54898	8.73729	29.706	2.42001	12.2752
			170-3	0.010548	500.883	122.319	71.65	46.446	27	25	2.95271	2.72389	16.6559	1.3493	12.3441
		2016-05-11	170-1	0.334065	588.723	158.302	45	52.0527	26	22	9.83139	12.5976	18.7913	1.93458	9.7134
			170-2	-0.025812	413.523	13.7899	48	40.9305	34	22	10.8637	20.7661	16.5488	1.43459	11.5356
			170-3	0.088709	296.183	49.9986	55	42.5451	37	23	3.61189	3.80382	17.3856	1.65424	10.5097
		2016-05-31	170-1	-0.0185958	210.605	15.0239	56.925	34.3918	26	25.5	4.17334	1.989	13.2196	1.22327	10.8068
			170-2	-0.0589936	344.973	6.7507	59.9	44.1615	30	23	5.46997	4.38251	13.3385	1.43451	9.29829
			170-3	0.0254101	369.539	-18.9438	68.475	39.8135	29.5	26	2.12578	1.99234	14.2134	1.41052	10.0767
		2016-06-15	170-1	0.0680184	285.66	62.0177	53	30.5785	31.5	28.5	9.42339	4.62901	15.3773	1.37759	11.1625
			170-2	-0.0427519	376.234	181.387	51.2	43.2187	35.5	27	8.85072	2.21989	17.8681	1.56703	11.4025
			170-3	0.0376799	451.98	109.443	60	38.1785	32.5	30	4.95464	2.95702	15.6526	1.59481	9.81469
		2016-07-06	170-1	0.274214	67.1859	-61.3363	44.375	50.8296	29.5	28	2.3186	9.98492	14.8688	1.26913	11.7157
			170-2	0.852743	426.189	281.299	66.225	53.2959	31.2	27.5	1.3633	7.51916	22.0765	1.86455	11.8402
			170-3	-0.052101	287.638	20.7496	72.65	65.0715	35.5	29	1.47411	6.12415	19.3495	1.61712	11.9654
		2016-07-20	170-1	-0.128939	188.25	31.1326	55.1	34.0787	27.5	28.5	2.97984	6.34192	14.7968	1.30858	11.3075
			170-2	0.121169	145.727	-3.19157	76.175	60.0854	31	28.2	1.53017	9.26894	15.8209	1.31677	12.0149
			170-3	0.204886	303.261	5.24341	71.675	57.7287	37	31.2	1.34407	4.73186	16.4047	1.39434	11.7652
		2016-08-17	170-1	-0.00477972	754.799	62.231	19.05	14.5038	27	28.5	3.06496	6.87023	10.6649	1.10492	9.65217
			170-2	0.00682862	1375.82	59.9973	18.85	24.1722	30.5	28.5	2.49518	3.06705	17.4463	1.71407	10.1783
			170-3	0.0413359	280.601	7.96853	20.575	16.234	32.2	29.5	1.93646	4.83534	17.6282	1.66234	10.6045
		2016-09-01	170-1	0.112932	291.964	6.02137	20.125	18.4834	25.5	25.5	4.41	4.85	12.4395	1.13111	10.9975
			170-2	-0.0865668	828.873	13.9205	30.4	23.0012	27	25	5.09	6.05	19.0975	1.77245	10.7746
			170-3	0.056741	136.03	-2.09144	25.475	17.096	32.2	27.5	4.68	5.07	16.3963	1.46853	11.1652
